# Supplementary material for: Prevalence of overweight and obesity among African primary school learners: a systematic review and meta‐analysis
Source: PubMed Central journal article supplement — Obes Sci Pract. 2019 Aug 20;5(5):487–502. doi: 10.1002/osp4.355 (PMC6819980; doi:10.1002/osp4.355), 2019-08-20

**A systematic review and meta-analysis of the prevalence of overweight and obesity among African school learners**

**Supplementary materials**

Theodosia Adom<sup>1,2\*</sup>, André Pascal Kengne<sup>3</sup>, Anniza De Villiers<sup>4</sup>, Thandi Puoane<sup>1</sup>

Institutional addresses:

<sup>1</sup> School of Public Health, Faculty of Community and Health Sciences, University of Western Cape, Cape Town, South Africa

<sup>2</sup> Nutrition Research Centre, Radiological and Medical Sciences Research Institute, Ghana Atomic Energy Commission, Accra, Ghana

<sup>3</sup> Non-communicable Disease Research Unit, South African Medical Research Council, Cape Town, South Africa

<sup>4</sup> Division of Research Capacity Development, South African Medical Research Council, Cape Town, South Africa

Email addresses:

TA: [theo.adom@gmail.com](mailto:theo.adom@gmail.com)

APK: [Andre.Kengne@mrc.ac.za](mailto:Andre.Kengne@mrc.ac.za)

AdV: [Anniza.DeVilliers@mrc.ac.za](mailto:Anniza.DeVilliers@mrc.ac.za)

TP: [tpuoane@uwc.ac.za](mailto:tpuoane@uwc.ac.za)

**Table S1. Search strategy for PubMed**

| Search | Search terms                                                                                                                                                                                                                                                                                                                                                                                                                                                                                                                                                                                                                                                                                                                                                                                                                                                                                                                                                                                                                                                                                                                                                                                                                                                                                                                                                                                                                                                                                                                                                                                 | Hits |
|--------|----------------------------------------------------------------------------------------------------------------------------------------------------------------------------------------------------------------------------------------------------------------------------------------------------------------------------------------------------------------------------------------------------------------------------------------------------------------------------------------------------------------------------------------------------------------------------------------------------------------------------------------------------------------------------------------------------------------------------------------------------------------------------------------------------------------------------------------------------------------------------------------------------------------------------------------------------------------------------------------------------------------------------------------------------------------------------------------------------------------------------------------------------------------------------------------------------------------------------------------------------------------------------------------------------------------------------------------------------------------------------------------------------------------------------------------------------------------------------------------------------------------------------------------------------------------------------------------------|------|
| 1      | Obesity [tw] OR obese [tw] OR overweight [tw] over weight [tw] OR over-weight [tw] OR weight disorder* [tw] OR body composition [tw] OR body mass index [tw] OR body weight* [tw] OR BMI [tw] OR body fat [tw] OR percent* body fat [tw] OR body fat percent* [tw] OR body fat distribution [tw] OR adiposity [tw] OR skinfold thickness [tw] OR skinfolds [tw]                                                                                                                                                                                                                                                                                                                                                                                                                                                                                                                                                                                                                                                                                                                                                                                                                                                                                                                                                                                                                                                                                                                                                                                                                              |      |
| 2      | Obesity [MeSH Terms]                                                                                                                                                                                                                                                                                                                                                                                                                                                                                                                                                                                                                                                                                                                                                                                                                                                                                                                                                                                                                                                                                                                                                                                                                                                                                                                                                                                                                                                                                                                                                                         |      |
| 3      | Overweight [MeSH Terms]                                                                                                                                                                                                                                                                                                                                                                                                                                                                                                                                                                                                                                                                                                                                                                                                                                                                                                                                                                                                                                                                                                                                                                                                                                                                                                                                                                                                                                                                                                                                                                      |      |
| 4      | # 1 OR # 2 OR # 3                                                                                                                                                                                                                                                                                                                                                                                                                                                                                                                                                                                                                                                                                                                                                                                                                                                                                                                                                                                                                                                                                                                                                                                                                                                                                                                                                                                                                                                                                                                                                                            |      |
| 5      | Learners [tw] OR schoolchildren [tw] OR school children [tw] OR school-children [tw] OR school going children [tw] OR school-going children [tw]                                                                                                                                                                                                                                                                                                                                                                                                                                                                                                                                                                                                                                                                                                                                                                                                                                                                                                                                                                                                                                                                                                                                                                                                                                                                                                                                                                                                                                             |      |
| 6      | # 4 AND # 5                                                                                                                                                                                                                                                                                                                                                                                                                                                                                                                                                                                                                                                                                                                                                                                                                                                                                                                                                                                                                                                                                                                                                                                                                                                                                                                                                                                                                                                                                                                                                                                  |      |
| 7      | (((((("Africa"[MeSH] OR Africa*[tw] OR Algeria[tw] OR Angola[tw] OR Benin[tw] OR Botswana[tw] OR "Burkina Faso"[tw] OR Burundi[tw] OR Cameroon[tw] OR "Canary Islands"[tw] OR "Cape Verde"[tw] OR "Central African Republic"[tw] OR Chad[tw] OR Comoros[tw] OR Congo[tw] OR "Democratic Republic of Congo"[tw] OR Djibouti[tw] OR Egypt[tw] OR "Equatorial Guinea"[tw] OR Eritrea[tw] OR Ethiopia[tw] OR Gabon[tw] OR Gambia[tw] OR Ghana[tw] OR Guinea[tw] OR "Guinea Bissau"[tw] OR "Ivory Coast"[tw] OR "Cote d'Ivoire"[tw] OR Jamahiriya[tw] OR Jamahirya[tw] OR Kenya[tw] OR Lesotho[tw] OR Liberia[tw] OR Libya[tw] OR Libia[tw] OR Madagascar[tw] OR Malawi[tw] OR Mali[tw] OR Mauritania[tw] OR Mauritius[tw] OR Mayote[tw] OR Morocco[tw] OR Mozambique[tw] OR Mocambique[tw] OR Namibia[tw] OR Niger[tw] OR Nigeria[tw] OR Principe[tw] OR Reunion[tw] OR Rwanda[tw] OR "Sao Tome"[tw] OR Senegal[tw] OR Seychelles[tw] OR "Sierra Leone"[tw] OR Somalia[tw] OR "South Africa"[tw] OR "St Helena"[tw] OR Sudan[tw] OR Swaziland[tw] OR Tanzania[tw] OR Togo[tw] OR Tunisia[tw] OR Uganda[tw] OR "Western Sahara"[tw] OR Zaire[tw] OR Zambia[tw] OR Zimbabwe[tw] OR "Central Africa"[tw] OR "Central African"[tw] OR "West Africa"[tw] OR "West African"[tw] OR "Western Africa"[tw] OR "Western African"[tw] OR "East Africa"[tw] OR "East African"[tw] OR "Eastern Africa"[tw] OR "Eastern African"[tw] OR "North Africa"[tw] OR "North African"[tw] OR "Northern Africa"[tw] OR "Northern African"[tw] OR "South African"[tw] OR "Southern Africa"[tw] OR "Southern African"[tw] |      |

|   |                                                                                                                                                                                           |  |
|---|-------------------------------------------------------------------------------------------------------------------------------------------------------------------------------------------|--|
|   | OR "sub Saharan Africa"[tw] OR "sub Saharan African"[tw] OR "subSaharan Africa"[tw] OR "subSaharan African"[tw]) NOT ("guinea pig"[tw] OR "guinea pigs"[tw] OR "aspergillus niger"[tw]))) |  |
| 8 | <u># 6 AND # 7</u>                                                                                                                                                                        |  |
| 9 | <u># 8 Limits: 1980/01/01 to 2017/02/28</u>                                                                                                                                               |  |

**Table S2: PRISMA checklist**

| Section/topic                      | #  | Checklist item                                                                                                                                                                                                                                                                                              | Reported on page #                 |
|------------------------------------|----|-------------------------------------------------------------------------------------------------------------------------------------------------------------------------------------------------------------------------------------------------------------------------------------------------------------|------------------------------------|
| <b>TITLE</b>                       |    |                                                                                                                                                                                                                                                                                                             |                                    |
| Title                              | 1  | Identify the report as a systematic review, meta-analysis, or both.                                                                                                                                                                                                                                         | 1                                  |
| <b>ABSTRACT</b>                    |    |                                                                                                                                                                                                                                                                                                             |                                    |
| Structured summary                 | 2  | Provide a structured summary including, as applicable: background; objectives; data sources; study eligibility criteria, participants, and interventions; study appraisal and synthesis methods; results; limitations; conclusions and implications of key findings; systematic review registration number. | 2                                  |
| <b>INTRODUCTION</b>                |    |                                                                                                                                                                                                                                                                                                             |                                    |
| Rationale                          | 3  | Describe the rationale for the review in the context of what is already known.                                                                                                                                                                                                                              | 3 & 4                              |
| Objectives                         | 4  | Provide an explicit statement of questions being addressed with reference to participants, interventions, comparisons, outcomes, and study design (PICOS).                                                                                                                                                  | 4                                  |
| <b>METHODS</b>                     |    |                                                                                                                                                                                                                                                                                                             |                                    |
| Protocol and registration          | 5  | Indicate if a review protocol exists, if and where it can be accessed (e.g., Web address), and, if available, provide registration information including registration number.                                                                                                                               | 4, PROSPERO, number CRD42016035248 |
| Eligibility criteria               | 6  | Specify study characteristics (e.g., PICOS, length of follow-up) and report characteristics (e.g., years considered, language, publication status) used as criteria for eligibility, giving rationale.                                                                                                      | 4                                  |
| Information sources                | 7  | Describe all information sources (e.g., databases with dates of coverage, contact with study authors to identify additional studies) in the search and date last searched.                                                                                                                                  | 4 & 5                              |
| Search                             | 8  | Present full electronic search strategy for at least one database, including any limits used, such that it could be repeated.                                                                                                                                                                               | 5                                  |
| Study selection                    | 9  | State the process for selecting studies (i.e., screening, eligibility, included in systematic review, and, if applicable, included in the meta-analysis).                                                                                                                                                   | 5                                  |
| Data collection process            | 10 | Describe method of data extraction from reports (e.g., piloted forms, independently, in duplicate) and any processes for obtaining and confirming data from investigators.                                                                                                                                  | 5                                  |
| Data items                         | 11 | List and define all variables for which data were sought (e.g., PICOS, funding sources) and any assumptions and simplifications made.                                                                                                                                                                       | 1                                  |
| Risk of bias in individual studies | 12 | Describe methods used for assessing risk of bias of individual studies (including specification of whether this was done at the study or outcome level), and how this information is to be used in any data synthesis.                                                                                      | 5                                  |
| Summary measures                   | 13 | State the principal summary measures (e.g., risk ratio, difference in means).                                                                                                                                                                                                                               | 5                                  |
| Synthesis of results               | 14 | Describe the methods of handling data and combining results of studies, if done, including measures of consistency (e.g., $I^2$ ) for each meta-analysis.                                                                                                                                                   | 5 & 6                              |

**Table S3: Summary of the quality scores of the included studies**

| Reference               | Is the hypothesis/ aim/ objective of the study clearly described? | Are the main outcomes to be measured clearly described in the Introduction or Methods section? | Are the characteristics of the patients included in the study clearly described? | Are the main findings of the study clearly described? | Does the study provide estimates of the random variability in the data for the main outcome | Have actual probability values been reported (e.g. 0.035 rather than <0.05) for the main outcomes except where the probability value is less than 0.001? | Were the subjects asked to participate in the study representative of the entire population from which they were recruited? | Were those subjects who were prepared to participate representative of the entire population from which they were recruited? | Were the statistical tests used to assess the main outcomes appropriate? | Were the main outcome measures used accurate (valid and reliable)? | Total score |
|-------------------------|-------------------------------------------------------------------|------------------------------------------------------------------------------------------------|----------------------------------------------------------------------------------|-------------------------------------------------------|---------------------------------------------------------------------------------------------|----------------------------------------------------------------------------------------------------------------------------------------------------------|-----------------------------------------------------------------------------------------------------------------------------|------------------------------------------------------------------------------------------------------------------------------|--------------------------------------------------------------------------|--------------------------------------------------------------------|-------------|
| Abrahams et al.(1)      | 1                                                                 | 1                                                                                              | 0                                                                                | 1                                                     | 1                                                                                           | 1                                                                                                                                                        | 0                                                                                                                           | 0                                                                                                                            | 1                                                                        | 1                                                                  | 7           |
| Amidu et al (2)         | 1                                                                 | 1                                                                                              | 1                                                                                | 0                                                     | 1                                                                                           | 1                                                                                                                                                        | 1                                                                                                                           | 0                                                                                                                            | 1                                                                        | 1                                                                  | 8           |
| Armstrong et al. (3)    | 1                                                                 | 1                                                                                              | 1                                                                                | 1                                                     | 1                                                                                           | 1                                                                                                                                                        | 1                                                                                                                           | 1                                                                                                                            | 1                                                                        | 1                                                                  | 10          |
| Boukthir, et al (4)     | 1                                                                 | 1                                                                                              | 1                                                                                | 1                                                     | 1                                                                                           | 1                                                                                                                                                        | 0                                                                                                                           | 0                                                                                                                            | 1                                                                        | 1                                                                  | 8           |
| Caleyachetty, et al (5) | 1                                                                 | 1                                                                                              | 0                                                                                | 1                                                     | 1                                                                                           | 1                                                                                                                                                        | 1                                                                                                                           | 1                                                                                                                            | 1                                                                        | 1                                                                  | 9           |
| Chebet et al (6)        | 1                                                                 | 1                                                                                              | 0                                                                                | 1                                                     | 1                                                                                           | 0                                                                                                                                                        | 0                                                                                                                           | 0                                                                                                                            | 0                                                                        | 1                                                                  | 5           |
| Daboné et al, (7)       | 1                                                                 | 1                                                                                              | 1                                                                                | 1                                                     | 1                                                                                           | 1                                                                                                                                                        | 0                                                                                                                           | 0                                                                                                                            | 1                                                                        | 1                                                                  | 8           |
| Dekkaki et al, (8)      | 1                                                                 | 1                                                                                              | 0                                                                                | 1                                                     | 1                                                                                           | 1                                                                                                                                                        | 1                                                                                                                           | 0                                                                                                                            | 1                                                                        | 1                                                                  | 8           |
| El-Sabely et al, (9)    | 1                                                                 | 1                                                                                              | 0                                                                                | 1                                                     | 1                                                                                           | 1                                                                                                                                                        | 0                                                                                                                           | 0                                                                                                                            | 1                                                                        | 1                                                                  | 7           |
| Fetuga et al (10)       | 1                                                                 | 1                                                                                              | 0                                                                                | 1                                                     | 1                                                                                           | 1                                                                                                                                                        | 1                                                                                                                           | 0                                                                                                                            | 1                                                                        | 1                                                                  | 8           |
| Hassan et al (11)       | 1                                                                 | 1                                                                                              | 0                                                                                | 1                                                     | 1                                                                                           | 0                                                                                                                                                        | 0                                                                                                                           | 0                                                                                                                            | 1                                                                        | 1                                                                  | 6           |
| Jinabhai et al, (12)    | 1                                                                 | 1                                                                                              | 1                                                                                | 1                                                     | 1                                                                                           | 0                                                                                                                                                        | 1                                                                                                                           | 1                                                                                                                            | 1                                                                        | 1                                                                  | 9           |
| Jinabhai et al, (13)    | 1                                                                 | 1                                                                                              | 1                                                                                | 1                                                     | 1                                                                                           | 1                                                                                                                                                        | 1                                                                                                                           | 0                                                                                                                            | 1                                                                        | 1                                                                  | 9           |
| Kirsten et al (14)      | 1                                                                 | 1                                                                                              | 1                                                                                | 1                                                     | 0                                                                                           | 1                                                                                                                                                        | 1                                                                                                                           | 0                                                                                                                            | 1                                                                        | 1                                                                  | 8           |
| Kyallo et al, (15)      | 1                                                                 | 1                                                                                              | 1                                                                                | 0                                                     | 1                                                                                           | 1                                                                                                                                                        | 0                                                                                                                           | 0                                                                                                                            | 1                                                                        | 1                                                                  | 7           |
| Maruf et al, (16)       | 1                                                                 | 1                                                                                              | 1                                                                                | 1                                                     | 1                                                                                           | 1                                                                                                                                                        | 1                                                                                                                           | 0                                                                                                                            | 1                                                                        | 1                                                                  | 9           |
| McKersie et al (17)     | 0                                                                 | 1                                                                                              | 1                                                                                | 1                                                     | 1                                                                                           | 0                                                                                                                                                        | 1                                                                                                                           | 0                                                                                                                            | 1                                                                        | 1                                                                  | 7           |
| Mogre et al, (18)       | 0                                                                 | 1                                                                                              | 0                                                                                | 1                                                     | 1                                                                                           | 1                                                                                                                                                        | 1                                                                                                                           | 0                                                                                                                            | 1                                                                        | 1                                                                  | 7           |

|                            |   |   |   |   |   |   |   |   |   |   |   |
|----------------------------|---|---|---|---|---|---|---|---|---|---|---|
| Mohammed et al, (19)       | 0 | 1 | 1 | 0 | 0 | 1 | 1 | 0 | 1 | 1 | 6 |
| Moselagomo et al (20)      | 1 | 1 | 1 | 1 | 1 | 1 | 0 | 0 | 1 | 1 | 8 |
| Mosha et al (21)           | 1 | 1 | 1 | 1 | 0 | 0 | 0 | 0 | 1 | 1 | 6 |
| Mpembeni, et al (22)       | 1 | 1 | 1 | 1 | 1 | 1 | 1 | 0 | 1 | 1 | 9 |
| Muhihi, et al (23)         | 1 | 1 | 1 | 1 | 1 | 1 | 1 | 0 | 1 | 1 | 9 |
| Muthuri et al (24)         | 1 | 1 | 1 | 1 | 1 | 1 | 0 | 1 | 1 | 1 | 9 |
| Mwaikambo et al, (25)      | 0 | 1 | 0 | 1 | 1 | 1 | 1 | 0 | 1 | 1 | 7 |
| Navti et al, (26)          | 1 | 1 | 0 | 0 | 1 | 1 | 1 | 0 | 1 | 1 | 7 |
| Oldewage-Theron et al (27) | 1 | 1 | 0 | 1 | 1 | 0 | 0 | 0 | 1 | 1 | 6 |
| Pangani, et al (28)        | 1 | 1 | 1 | 0 | 1 | 1 | 1 | 0 | 1 | 1 | 8 |
| Pedro et al (29)           | 1 | 1 | 1 | 1 | 1 | 1 | 0 | 0 | 1 | 1 | 8 |
| Pienaar, 2015 (30)         | 0 | 1 | 0 | 1 | 0 | 1 | 1 | 1 | 1 | 1 | 7 |
| Prista et al (31)          | 1 | 1 | 0 | 1 | 1 | 1 | 0 | 0 | 1 | 1 | 7 |
| Puckree et al, (32)        | 1 | 1 | 1 | 0 | 1 | 1 | 0 | 0 | 1 | 1 | 7 |
| Regaieg, et al (33)        | 1 | 1 | 0 | 1 | 1 | 1 | 0 | 0 | 1 | 1 | 7 |
| Salman et al (34)          | 1 | 1 | 0 | 1 | 1 | 0 | 0 | 0 | 1 | 1 | 6 |
| Sebbani et al, (35)        | 1 | 1 | 0 | 0 | 1 | 0 | 1 | 0 | 1 | 1 | 6 |
| Taleb et al, (36)          | 1 | 1 | 0 | 0 | 1 | 1 | 0 | 0 | 1 | 1 | 6 |
| Tathiah et al (37)         | 1 | 1 | 1 | 1 | 1 | 0 | 0 | 0 | 1 | 1 | 7 |
| Truter et al (38)          | 1 | 1 | 0 | 1 | 1 | 0 | 0 | 1 | 1 | 1 | 7 |
| Van Den Ende, et al (39)   | 1 | 1 | 0 | 1 | 1 | 1 | 0 | 0 | 1 | 1 | 7 |
| Wiles et al, (40)          | 1 | 0 | 1 | 1 | 1 | 0 | 0 | 0 | 1 | 1 | 6 |

**Table S4. Summary statistics from meta-analyses of prevalence studies of overweight in African school going children using random effects model and arcsine transformations**

| Group   | Subgroup | Criteria    | N Studies | N participants | N Cases | Prev (95% CI)    | H (95% CI)          | I <sup>2</sup> (95% CI) | P-heterogeneity | P-dif criteria | P-dif sub-groups | P- Egger |
|---------|----------|-------------|-----------|----------------|---------|------------------|---------------------|-------------------------|-----------------|----------------|------------------|----------|
| Overall |          |             |           |                |         |                  |                     |                         |                 | 0.0027         |                  |          |
|         |          | WHO         | 21        | 36981          | 2340    | 10.5 [7.1-14.3]  | 8.73 [8.01-9.53]    | 98.7 [98.4-98.9]        | <0.0001         |                |                  | 0.003    |
|         |          | IOTF        | 18        | 51604          | 3491    | 9.5 [6.5-13.0]   | 11.27 [10.41-12.20] | 99.2 [99.1-99.3]        | <0.0001         |                |                  | 0.020    |
|         |          | CDC         | 4         | 2433           | 283     | 11.5 [9.6-13.4]  | 1.39 [1.00-2.41]    | 48.0 [0.0-82.7]         | 0.124           |                |                  | 0.912    |
|         |          | Unspecified | 2         | 1361           | 14      | 0.5 [0.0-4.5]    | 5.32 [ - ]          | 96.5 [90.4-98.7]        | <0.0001         |                |                  | -        |
| Gender  | Overall  |             |           |                |         |                  |                     |                         |                 | 0.0028         |                  |          |
|         |          | WHO         | 29        | 11028          | 1313    | 11.4 [8.4-14.9]  | 5.43 [4.91-6.00]    | 96.6 [95.9-97.2]        | <0.0001         |                | 0.192            | 0.557    |
|         |          | IOTF        | 28        | 25623          | 2884    | 10.3 [8.4-12.3]  | 5.02 [4.51-5.58]    | 96.0 [95.1-96.8]        | <0.0001         |                | 0.175            | 0.425    |
|         |          | CDC         | 6         | 2033           | 239     | 11.5 [9.5-13.7]  | 1.38 [1.00-2.19]    | 47.6 [0.0-79.2]         | 0.089           |                | 0.293            | 0.702    |
|         |          | Unspecified | 2         | 1361           | 14      | 0.5 [0.0-4.5]    |                     |                         |                 |                |                  |          |
|         | Boys     |             |           |                |         |                  |                     |                         |                 | <0.0001        |                  |          |
|         |          | WHO         | 14        | 4965           | 462     | 9.3 [5.6-13.8]   | 4.89 [4.18-5.71]    | 95.8 [94.3-96.9]        | <0.0001         |                |                  | 0.478    |
|         |          | IOTF        | 14        | 13316          | 1267    | 8.9 [7.0-11.1]   | 3.81 [3.18-4.57]    | 93.1 [90.1-95.2]        | <0.0001         |                |                  | 0.634    |
|         |          | CDC         | 3         | 958            | 104     | 9.8 [5.8-14.7]   | 1.88 [1.02-3.46]    | 71.7 [4.3-91.7]         | 0.029           |                |                  | 0.702    |
|         |          | Unspecified | 1         | 678            | 14      | 2.1 [1.1-3.3]    | -                   | -                       | -               |                |                  | -        |
|         | Girls    |             |           |                |         |                  |                     |                         |                 | <0.0001        |                  |          |
|         |          | WHO         | 15        | 6063           | 851     | 13.6 [9.0-19.0]  | 5.67 [4.94-6.50]    | 96.9 [95.9-97.6]        | <0.0001         |                |                  | 0.742    |
|         |          | IOTF        | 14        | 12307          | 1617    | 11.7 [8.4-15.4]  | 5.68 [4.93-6.55]    | 96.9 [95.9-97.7]        | <0.0001         |                |                  | 0.426    |
|         |          | CDC         | 3         | 1075           | 135     | 12.5 [10.6-14.6] | 1.00 [1.00-1.96]    | 0.0 [0.0-74.1]          | 0.669           |                |                  | 0.205    |
|         |          | Unspecified | 1         | 683            | 0       | 0.0 [0.0-0.01]   | -                   | -                       | -               |                |                  | -        |
| Setting | Overall  |             |           |                |         |                  |                     |                         |                 | 0.115          |                  |          |
|         |          | WHO         | 24        | 42803          | 2733    | 10.3 [7.5-13.6]  | 8.62 [7.94-9.35]    | 98.7 [98.4-98.9]        | <0.0001         |                | 0.051            | 0.001    |
|         |          | IOTF        | 21        | 50863          | 3315    | 7.7 [5.1-10.7]   | 10.59 [9.81-11.42]  | 99.1 [99.0-99.2]        | <0.0001         |                | 0.119            | 0.088    |
|         |          | CDC         | 4         | 2433           | 282     | 11.5 [9.6-13.4]  | 1.39 [1.00-2.41]    | 48.0 [0.0-82.7]         | 0.124           |                | 0.256            | 0.912    |
|         | Rural    |             |           |                |         |                  |                     |                         |                 | 0.305          |                  |          |
|         |          | WHO         | 4         | 3962           | 256     | 6.9 [3.3-11.6]   | 2.98 [1.95-4.55]    | 88.8 [73.8-95.2]        | <0.0001         |                |                  | 0.706    |
|         |          | IOTF        | 7         | 1532           | 102     | 4.0 [1.3-8.2]    | 5.58 [4.52-6.89]    | 96.8 [95.1-97.9]        | <0.0001         |                |                  | 0.149    |
|         |          | CDC         | 0         | -              | -       | -                | -                   | -                       | -               |                | -                | -        |

|             |         |       |       |                  |                     |                     |                  |         |         |       |       |  |  |
|-------------|---------|-------|-------|------------------|---------------------|---------------------|------------------|---------|---------|-------|-------|--|--|
| Type        | Urban   |       |       |                  |                     |                     |                  |         |         | 0.575 |       |  |  |
|             | WHO     | 15    | 10689 | 1422             | 12.8 [8.7-17.5]     | 6.85 [6.06-7.73]    | 97.3 [97.3-98.3] | <0.0001 |         |       | 0.685 |  |  |
|             | IOTF    | 8     | 9880  | 964              | 9.4 [5.2-14.7]      | 7.87 [6.73-9.20]    | 98.4 [97.8-98.8] | <0.0001 |         |       | 0.592 |  |  |
|             | CDC     | 3     | 1987  | 238              | 12.0 [9.8-14.4]     | 1.44 [1.00-2.68]    | 51.8 [0.0-86.1]  | 0.126   |         |       | 0.924 |  |  |
|             | Both    |       |       |                  |                     |                     |                  |         |         | 0.289 |       |  |  |
|             | WHO     | 5     | 30582 | 1209             | 6.6 [3.8-10.1]      | 7.23 [5.82-8.99]    | 98.1 [97.0-98.8] | <0.0001 |         |       | 0.197 |  |  |
|             | IOTF    | 6     | 37021 | 2095             | 10.5 [4.7-18.3]     | 16.83 [15.07-18.79] | 99.6 [99.6-99.7] | <0.0001 |         |       | 0.249 |  |  |
|             | CDC     | 1     | 446   | 44               | 9.9 [7.3-12.8]      | -                   | -                | -       |         |       | -     |  |  |
|             | Overall |       |       |                  |                     |                     |                  |         |         | 0.177 |       |  |  |
|             | WHO     | 27    | 15720 | 2171             | 13.3 [10.0-17.0]    | 6.51 [5.94-7.14]    | 97.6 [97.2-98.0] | <0.0001 |         | 0.013 | 0.553 |  |  |
| IOTF        | 20      | 53689 | 3656  | 9.1 [6.3-12.3]   | 10.86 [10.05-11.72] | 99.2 [99.0-99.3]    | <0.0001          |         | <0.0001 | 0.018 |       |  |  |
| CDC         | 5       | 2529  | 276   | 10.1 [7.5-13.0]  | 2.10 [1.35-3.26]    | 77.3 [45.1-90.6]    | 0.001            |         | 0.107   | 0.431 |       |  |  |
| Public      |         |       |       |                  |                     |                     |                  |         | 0.499   |       |       |  |  |
| WHO         | 13      | 7778  | 843   | 11.2 [7.4-15.7]  | 5.73 [4.94-6.63]    | 97.0 [95.9-97.7]    | <0.0001          |         |         | 0.372 |       |  |  |
| IOTF        | 8       | 7493  | 776   | 7.6 [3.7-12.9]   | 7.57 [6.44-8.88]    | 98.3 [97.6-98.7]    | <0.0001          |         |         | 0.241 |       |  |  |
| CDC         | 2       | 1483  | 163   | 8.0 [2.2-17.0]   | 3.68 [ - ]          | 92.6 [75.2-97.8]    | 0.0002           |         |         | -     |       |  |  |
| Private     |         |       |       |                  |                     |                     |                  |         | 0.209   |       |       |  |  |
| WHO         | 5       | 1648  | 401   | 22.6 [16.0-30.0] | 3.22 [2.26-4.60]    | 90.4 [80.5-95.3]    | <0.0001          |         |         | 0.611 |       |  |  |
| IOTF        | 1       | 692   | 126   | 18.2 [15.4-21.2] | -                   | -                   | -                |         |         | -     |       |  |  |
| CDC         | 1       | 200   | 30    | 15.0 [10.4-20.3] | -                   | -                   | -                |         |         | -     |       |  |  |
| Both        |         |       |       |                  |                     |                     |                  |         | 0.783   |       |       |  |  |
| WHO         | 9       | 6294  | 927   | 11.9 [6.5-18.8]  | 7.57 [6.52-8.80]    | 98.3 [97.6-98.7]    | <0.0001          |         |         | 0.359 |       |  |  |
| IOTF        | 11      | 45504 | 2754  | 9.5 [5.9-13.9]   | 12.56 [11.41-13.82] | 99.4 [99.2-99.5]    | <0.0001          |         |         | 0.057 |       |  |  |
| CDC         | 2       | 846   | 83    | 9.8 [7.9-11.9]   | 1.00 [ - ]          | 0.0 [ - ]           | 0.955            |         |         | -     |       |  |  |
| Region      |         |       |       |                  |                     |                     |                  |         | 0.0027  |       |       |  |  |
| Overall     |         |       |       |                  |                     |                     |                  |         |         |       |       |  |  |
| WHO         | 21      | 36981 | 2340  | 10.5 [7.1-14.3]  | 8.73 [8.01-9.53]    | 98.7 [98.4-98.9]    | <0.0001          |         | 0.155   | 0.003 |       |  |  |
| IOTF        | 18      | 51604 | 3491  | 9.5 [6.5-13.0]   | 11.27 [10.41-12.20] | 99.2 [99.1-99.3]    | <0.0001          |         | 0.684   | 0.020 |       |  |  |
| CDC         | 4       | 2433  | 283   | 11.5 [9.6-13.4]  | 1.39 [1.00-2.41]    | 48.0 [0.0-82.7]     | 0.124            |         | 0.434   | 0.912 |       |  |  |
| Unspecified | 2       | 1361  | 14    | 0.5 [0.0-4.5]    | 5.32 [ - ]          | 96.5 [90.4-98.7]    | <0.0001          |         | -       | -     |       |  |  |
| Central     |         |       |       |                  |                     |                     |                  |         | -       |       |       |  |  |



|                  |             |    |       |      |                  |                     |                  |         |        |       |
|------------------|-------------|----|-------|------|------------------|---------------------|------------------|---------|--------|-------|
|                  | WHO         | 1  | 557   | 82   | 14.7 [11.9-17.8] | -                   | -                | -       | -      | -     |
|                  | IOTF        | 0  | -     | -    | -                | -                   | -                | -       | -      | -     |
|                  | CDC         | 0  | -     | -    | -                | -                   | -                | -       | -      | -     |
|                  | Eastern     |    |       |      |                  |                     |                  |         | 0.740  |       |
|                  | WHO         | 4  | 3730  | 698  | 16.1 [7.7-26.8]  | 7.77 [6.11-9.87]    | 98.3 [97.3-99.0] | <0.0001 |        | 0.678 |
|                  | IOTF        | 2  | 2168  | 260  | 14.1 [6.8-23.5]  | 4.65                | 95.4 [86.4-98.4] | <0.0001 |        | -     |
|                  | CDC         | 2  | 750   | 89   | 12.1 [7.7-17.3]  | 2.03                | 75.7 [0.0-94.5]  | 0.042   |        | -     |
|                  | Northern    |    |       |      |                  |                     |                  |         | 0.853  |       |
|                  | WHO         | 3  | 3276  | 296  | 11.4 [5.2-19.5]  | 6.16 [4.40-8.62]    | 97.4 [94.8-98.7] | <0.0001 |        | 0.444 |
|                  | IOTF        | 4  | 7678  | 701  | 10.1 [4.7-17.3]  | 9.08 [7.31-11.27]   | 98.8 [98.1-99.2] | <0.0001 |        | 0.213 |
|                  | CDC         | 1  | 1283  | 154  | 12.0 [10.3-13.8] | -                   | -                | -       |        | -     |
|                  | Southern    |    |       |      |                  |                     |                  |         | 0.014  |       |
|                  | WHO         | 9  | 27265 | 1140 | 8.7 (4.7-13.8)   | 6.31 [5.33-7.47]    | 97.5 [96.5-98.2] | <0.0001 |        | 0.032 |
|                  | IOTF        | 11 | 39983 | 2358 | 8.5 [4.6-13.5]   | 12.72 [11.57-13.99] | 99.4 [99.3-99.5] | <0.0001 |        | 0.179 |
|                  | CDC         | 0  | -     | -    | -                | -                   | -                | -       |        | -     |
|                  | Undefined   | 2  | 1361  | 14   | 0.5 [0.0-4.5]    | 5.52 [ - ]          | 96.5 [90.4-98.7] | <0.0001 |        | -     |
|                  | Western     |    |       |      |                  |                     |                  |         | 0.864  |       |
|                  | WHO         | 4  | 2153  | 124  | 7.7 [2.4-15.7]   | 5.60 [4.17-7.51]    | 96.8 [94.2-98.2] | <0.0001 |        | 0.136 |
|                  | IOTF        | 1  | 1775  | 172  | 9.7 [8.4-11.1]   | -                   | -                | -       |        | -     |
|                  | CDC         | 1  | 400   | 39   | 9.7 [7.0-12.8]   | -                   | -                | -       |        | -     |
| Coverage         |             |    |       |      |                  |                     |                  |         | 0.0027 |       |
|                  | Overall     |    |       |      |                  |                     |                  |         |        |       |
|                  | WHO         | 21 | 36981 | 2340 | 10.5 [7.1-14.3]  | 8.73 [8.01-9.53]    | 98.7 [98.4-98.9] | <0.0001 |        | 0.003 |
|                  | IOTF        | 18 | 51604 | 3491 | 9.5 [6.5-13.0]   | 11.27 [10.41-12.20] | 99.2 [99.1-99.3] | <0.0001 |        | 0.020 |
|                  | CDC         | 4  | 2433  | 283  | 11.5 [9.6-13.4]  | 1.39 [1.00-2.41]    | 48.0 [0.0-82.7]  | 0.124   |        | 0.912 |
|                  | Unspecified | 2  | 1361  | 14   | 0.5 [0.0-4.5]    | 5.32 [ - ]          | 96.5 [90.4-98.7] | <0.0001 | -      | -     |
| Publication year |             |    |       |      |                  |                     |                  |         |        |       |
|                  | <2013       |    |       |      |                  |                     |                  |         | 0.0013 |       |
|                  | WHO         | 11 | 30299 | 1215 | 6.6 [4.6-8.9]    | 4.66 [3.88-5.59]    | 95.4 [93.4-96.8] | <0.0001 | 0.0007 | 0.028 |
|                  | IOTF        | 6  | 40438 | 2385 | 10.9 [5.1-18.4]  | 18.07 [16.28-20.07] | 99.7 [99.6-99.8] | <0.0001 | 0.585  | 0.180 |
|                  | CDC         | 2  | 1587  | 199  | 12.9 [10.5-15.5] | 1.29 [ - ]          | 39.9 [ - ]       | 0.197   | 0.061  | -     |
|                  | Unspecified | 0  | -     | -    | -                | -                   | -                | -       | -      | -     |
|                  | >=2013      |    |       |      |                  |                     |                  |         | 0.0005 |       |

|             |             |             |     |       |      |                  |                  |                  |                  |         |       |       |
|-------------|-------------|-------------|-----|-------|------|------------------|------------------|------------------|------------------|---------|-------|-------|
| Sample size | <638        | WHO         | 10  | 6682  | 1125 | 15.4 [10.6-20.9] | 5.70 [4.80-6.75] | 96.9 [95.7-97.8] | <0.0001          |         | 0.799 |       |
|             |             | IOTF        | 12  | 11166 | 1106 | 8.9 [6.4-11.7]   | 4.92 [4.15-5.82] | 95.9 [94.2-97.0] | <0.0001          |         | 0.581 |       |
|             |             | CDC         | 2   | 846   | 83   | 9.8 [7.9-11.9]   | 1.00 [-]         | 0.0 [-]          | 0.955            |         | -     |       |
|             |             | Unspecified | 2   | 1361  | 14   | 0.5 [0.0-4.5]    | 5.32 [-]         | 96.5 [90.4-98.7] | <0.0001          |         | -     |       |
|             |             |             |     |       |      |                  |                  |                  | 0.0027           |         |       |       |
|             |             |             |     |       |      |                  |                  |                  | 0.578            |         |       |       |
|             |             | >=638       | WHO | 13    | 4555 | 544              | 11.3 [7.9-15.2]  | 3.93 [3.27-4.73] | 93.5 [90.6-95.5] | <0.0001 | 0.571 | 0.869 |
|             | IOTF        |             | 6   | 2699  | 240  | 7.8 [3.1-14.3]   | 5.56 [4.42-7.01] | 96.8 [94.9-98.0] | <0.0001          | 0.566   | 0.959 |       |
|             | CDC         |             | 3   | 1150  | 128  | 11.2 [8.4-14.4]  | 1.62 [1.00-3.02] | 61.7 [0.0-89.1]  | 0.074            | 0.667   | 0.198 |       |
|             | Unspecified |             | 0   | -     | -    | -                |                  |                  |                  |         | -     |       |
|             |             |             |     |       |      |                  |                  |                  | 0.0016           |         |       |       |
|             |             |             |     |       |      |                  |                  |                  |                  |         |       |       |
|             |             |             |     |       |      |                  |                  |                  |                  |         |       |       |
|             |             |             |     |       |      |                  |                  |                  |                  |         |       |       |
|             |             |             |     |       |      |                  |                  |                  |                  |         |       |       |
|             |             |             |     |       |      |                  |                  |                  |                  |         |       |       |
|             |             |             |     |       |      |                  |                  |                  |                  |         |       |       |
|             |             |             |     |       |      |                  |                  |                  |                  |         |       |       |
|             |             |             |     |       |      |                  |                  |                  |                  |         |       |       |

Note: - not computable

**Table S5. Summary statistics from meta-analyses of prevalence studies of obesity in African school going children using random effects model and arcsine transformations**

| Group   | Subgroup | Criteria    | N studies | N participants | N Cases | Prev (95% CI)  | H (95% CI)       | I <sup>2</sup> (95% CI) | P-heterogeneity | P-dif criteria | P-dif sub-groups | P- Egger |
|---------|----------|-------------|-----------|----------------|---------|----------------|------------------|-------------------------|-----------------|----------------|------------------|----------|
| Overall |          | WHO         | 18        | 34895          | 979     | 6.1 [3.4-9.7]  | 9.12 [8.32-9.99] | 98.8 [98.6-99.0]        | <0.0001         | <0.0001        |                  | 0.0019   |
|         |          | IOTF        | 16        | 50779          | 1120    | 4.0 [2.5-5.9]  | 8.56 [7.74-9.47] | 98.6 [98.3-98.9]        | <0.0001         |                |                  | 0.003    |
|         |          | CDC         | 4         | 2433           | 158     | 6.9 [5.0-9.0]  | 1.82 [1.07-3.09] | 69.8 [13.2-89.5]        | 0.019           |                |                  | 0.320    |
|         |          | Unspecified | 2         | 1361           | 8       | 0.5 [0.01-1.7] | 2.34 [ - ]       | 81.8 [22.9-95.7]        | 0.019           |                |                  | -        |
| Gender  | Overall  |             |           |                |         |                |                  |                         |                 | <0.0001        |                  |          |
|         |          | WHO         | 25        | 8942           | 696     | 7.0 [4.5-10.1] | 5.20 [4.65-5.81] | 96.3 [95.4-97.0]        | <0.0001         |                | 0.212            | 0.475    |
|         |          | IOTF        | 26        | 24798          | 907     | 4.3 [3.4-5.3]  | 3.53 [3.08-4.05] | 92.0 [89.5-93.9]        | <0.0001         |                | 0.295            | 0.047    |
|         |          | CDC         | 6         | 2033           | 126     | 6.2 [4.7-8.0]  | 1.44 [1.00-2.28] | 51.7 [0.0-80.8]         | 0.066           |                | 0.128            | 0.743    |
|         |          | Unspecified | 2         | 1361           | 8       | 0.5 [0.0-1.7]  | 2.34 [ - ]       | 81.8 [22.9-95.7]        | 0.019           |                | 0.019            | -        |
|         | Boys     |             |           |                |         |                |                  |                         |                 | <0.0001        |                  |          |
|         |          | WHO         | 12        | 4011           | 241     | 5.3 [2.3-9.3]  | 4.83 [4.08-5.73] | 95.7 [94.0-97.0]        | <0.0001         |                |                  | 0.655    |
|         |          | IOTF        | 13        | 12895          | 384     | 3.8 [2.7-5.0]  | 3.8 [2.7-5.0]    | 88.8 [82.8-92.8]        | <0.0001         |                |                  | 0.034    |
|         |          | CDC         | 3         | 958            | 49      | 5.1 [3.8-6.6]  | 1.00 [1.00-2.22] | 0.0 [0.0-79.8]          | 0.598           |                |                  | 0.823    |
|         |          | Unspecified | 1         | 678            | 7       | 1.0 [0.4-1.9]  | -                | -                       | -               |                |                  | -        |
|         | Girls    |             |           |                |         |                |                  |                         |                 | <0.0001        |                  |          |
|         |          | WHO         | 13        | 4931           | 455     | 8.9 [4.9-13.8] | 5.42 [4.66-6.32] | 96.6 [95.4-97.5]        | <0.0001         |                |                  | 0.515    |
|         |          | IOTF        | 13        | 11903          | 523     | 4.8 [3.3-6.5]  | 3.81 [3.15-4.60] | 93.1 [89.9-95.3]        | <0.0001         |                |                  | 0.435    |
|         |          | CDC         | 3         | 1075           | 77      | 7.5 [4.8-10.6] | 1.72 [1.00-3.20] | 66.1 [0.0-90.2]         | 0.052           |                |                  | 0.540    |
|         |          | Unspecified | 1         | 683            | 1       | 0.1 [0.0-0.6]  | -                | -                       | -               |                |                  | -        |
| Setting | Overall  |             |           |                |         |                |                  |                         |                 | 0.0041         |                  |          |
|         |          | WHO         | 21        | 40717          | 1106    | 5.6 [3.4-8.3]  | 8.83 [8.10-9.62] | 98.7 [98.5-98.9]        | <0.0001         |                | <0.0001          | 0.001    |
|         |          | IOTF        | 19        | 50038          | 1085    | 3.7 [2.3-5.4]  | 7.74 [7.01-8.55] | 98.3 [98.0-98.6]        | <0.0001         |                | 0.082            | 0.0056   |
|         |          | CDC         | 4         | 2433           | 158     | 6.9 [5.0-9.0]  | 1.82 [1.07-3.09] | 69.8 [13.2-89.5]        | 0.0191          |                | 0.163            | 0.320    |
|         | Rural    |             |           |                |         |                |                  |                         |                 | 0.757          |                  |          |
|         |          | WHO         | 4         | 1532           | 22      | 1.5 [0.6-2.9]  | 1.69 [1.00-2.91] | 65.2 [0.0-88.2]         | 0.035           |                |                  | 0.360    |
|         |          | IOTF        | 5         | 3137           | 70      | 1.8 [0.6-3.7]  | 3.24 [2.28-4.62] | 90.5 [80.7-95.3]        | <0.0001         |                |                  | 0.880    |
|         |          | CDC         | 0         | -              | -       |                |                  | -                       | -               |                | -                | -        |
|         | Urban    |             |           |                |         |                |                  |                         |                 | 0.076          |                  |          |

|             |         |        |      |       |                  |                  |                     |                  |                  |         |       |        |         |       |       |       |
|-------------|---------|--------|------|-------|------------------|------------------|---------------------|------------------|------------------|---------|-------|--------|---------|-------|-------|-------|
| Type        | Both    | WHO    | 12   | 8603  | 783              | 9.8 [6.0-14.6]   | 6.61 [5.74-7.60]    | 97.7 [97.0-98.3] | <0.0001          | 0.013   | 0.214 |        |         |       |       |       |
|             |         | IOTF   | 8    | 9880  | 375              | 4.9 [3.0-7.2]    | 4.73 [3.81-5.87]    | 95.5 [93.1-97.1] | <0.0001          |         |       | 0.035  |         |       |       |       |
|             |         | CDC    | 3    | 1987  | 135              | 7.5 [5.1-10.5]   | 2.05 [1.13-3.71]    | 76.1 [21.5-92.7] | 0.015            |         |       | 0.207  |         |       |       |       |
|             |         | WHO    | 5    | 30582 | 301              | 1.9 [0.9-3.1]    | 4.69 [3.52-6.24]    | 95.4 [91.9-97.4] | <0.0001          |         |       | 0.187  |         |       |       |       |
|             |         | IOTF   | 6    | 37021 | 640              | 4.0 [1.5-7.7]    | 11.92 [10.36-13.71] | 99.3 [99.1-99.5] | <0.0001          |         |       | 0.186  |         |       |       |       |
|             |         | CDC    | 1    | 446   | 23               | 5.2 [3.3-7.4]    | -                   | -                | -                |         |       | -      |         |       |       |       |
|             | Overall | WHO    | 24   | 13634 | 1183             | 8.7 [5.8-12.0]   | 6.47 [5.87-7.14]    | 97.6 [97.1-98.0] | <0.0001          | 0.009   | 0.018 | 0.228  |         |       |       |       |
|             |         | IOTF   | 28   | 52864 | 1212             | 3.7 [2.3-5.4]    | 8.50 [7.72-9.35]    | 98.6 [98.3-98.9] | <0.0001          |         |       |        | 0.003   | 0.004 |       |       |
|             |         | CDC    | 5    | 2529  | 156              | 6.2 [4.1-8.7]    | 2.18 [1.41-3.36]    | 78.9 [49.6-91.1] | 0.0008           |         |       |        | 0.008   | 0.767 |       |       |
|             |         | Public | WHO  | 12    | 6762             | 807              | 6.2 [3.1-10.3]      | 5.95 [5.13-6.92] | 97.2 [96.2-97.9] |         |       |        | <0.0001 | 0.675 | 0.446 |       |
|             |         |        | IOTF | 6     | 6668             | 764              | 4.9 [2.5-8.1]       | 5.36 [4.23-6.78] | 96.5 [94.4-97.8] |         |       |        | <0.0001 |       |       | 0.955 |
|             |         |        | CDC  | 2     | 1483             | 163              | 4.2 [1.6-7.9]       | 2.16 [ - ]       | 78.6 [6.8-95.1]  |         |       |        | 0.031   |       |       | -     |
| Private     | WHO     | 5      | 1648 | 255   | 16.6 [10.4-23.8] | 3.49 [2.49-4.90] | 91.8 [83.8-95.8]    | <0.0001          | <0.0001          | 0.539   |       |        |         |       |       |       |
|             | IOTF    | 1      | 692  | 8     | 1.2 [0.5-2.1]    | -                | -                   | -                |                  |         | -     |        |         |       |       |       |
|             | CDC     | 1      | 200  | 25    | 12.5 [8.3-17.4]  | -                | -                   | -                |                  |         | -     |        |         |       |       |       |
| Region      | Both    | WHO    | 7    | 5224  | 487              | 8.3 [3.2-15.4]   | 7.93 [6.70-9.38]    | 98.4 [98.4-98.9] | <0.0001          | 0.069   | 0.905 |        |         |       |       |       |
|             |         | IOTF   | 11   | 45504 | 841              | 3.3 [1.8-5.3]    | 9.08 [8.06-10.23]   | 98.8 [98.5-99.0] | <0.0001          |         |       | 0.044  |         |       |       |       |
|             |         | CDC    | 2    | 846   | 52               | 6.2 [4.1-8.7]    | 1.40 [ - ]          | 49.2 [ - ]       | 0.160            |         |       | -      |         |       |       |       |
|             | Overall | WHO    | 18   | 34895 | 979              | 6.1 [3.4-9.7]    | 9.12 [8.32-9.99]    | 98.8 [98.6-99.0] | <0.0001          | <0.0001 | 0.115 | 0.0019 |         |       |       |       |
|             |         | IOTF   | 16   | 50779 | 1120             | 4.0 [2.5-5.9]    | 8.56 [7.74-9.47]    | 98.6 [98.3-98.9] | <0.0001          |         |       |        | <0.0001 | 0.003 |       |       |
|             |         | CDC    | 4    | 2433  | 158              | 6.9 [5.0-9.0]    | 1.82 [1.07-3.09]    | 69.8 [13.2-89.5] | 0.019            |         |       |        | 0.379   | 0.320 |       |       |
| Unspecified |         | 2      | 1361 | 8     | 0.5 [0.01-1.7]   | 2.34 [ - ]       | 81.8 [22.9-95.7]    | 0.019            | -                |         |       |        | -       |       |       |       |
| Central     |         | WHO    | 1    |       |                  | 2.9 [1.6-4.4]    | -                   | -                | -                |         |       |        | -       | -     |       |       |

|                  |             |    |       |      |                |                     |                  |         |         |        |
|------------------|-------------|----|-------|------|----------------|---------------------|------------------|---------|---------|--------|
|                  | IOTF        | 0  | -     | -    | -              | -                   | -                | -       | -       | -      |
|                  | CDC         | 0  | -     | -    | -              | -                   | -                | -       | -       | -      |
| Eastern          |             |    |       |      |                |                     |                  |         | 0.125   |        |
|                  | WHO         | 4  | 3730  | 390  | 9.6 [3.8-17.6] | 6.95 [5.38-8.99]    | 97.9 [96.5-98.8] | <0.0001 |         | 0.976  |
|                  | IOTF        | 2  | 2168  | 101  | 4.6 [3.8-5.6]  | 1.00 [-]            | 0.0 [-]          | 0.428   |         | -      |
|                  | CDC         | 2  | 750   | 55   | 7.6 [3.2-13.6] | 2.72 [-]            | 86.5 [46.6-96.6] | 0.042   |         | -      |
| Northern         |             |    |       |      |                |                     |                  |         | 0.219   |        |
|                  | WHO         | 3  | 3276  | 177  | 8.7 [2.2-19.2] | 8.27 [6.25-10.94]   | 98.5 [97.4-99.2] | <0.0001 |         | 0.092  |
|                  | IOTF        | 4  | 7678  | 239  | 3.5 [1.5-6.1]  | 5.43 [4.02-7.33]    | 96.6 [93.8-98.1] | <0.0001 |         | 0.111  |
|                  | CDC         | 1  | 1283  | 73   | 5.7 [4.5-7.0]  | -                   | -                | -       |         | -      |
| Southern         |             |    |       |      |                |                     |                  |         | 0.0044  |        |
|                  | WHO         | 7  | 26195 | 339  | 4.1 [0.7-9.9]  | 7.52 [6.32-8.95]    | 98.2 [97.5-98.8] | <0.0001 |         | 0.123  |
|                  | IOTF        | 9  | 39158 | 766  | 4.6 [2.2-7.8]  | 10.41 [9.22-11.76]  | 99.1 [98.8-99.3] | <0.0001 |         | 0.043  |
|                  | CDC         | 0  | -     | -    | -              | -                   | -                | -       |         | -      |
|                  | Undefined   | 2  | 1361  | 8    | 0.5 [0.0-1.7]  | 2.34 [-]            | 81.8 [22.9-95.7] | 0.019   |         | -      |
| Western          |             |    |       |      |                |                     |                  |         | <0.0001 |        |
|                  | WHO         | 3  | 1137  | 57   | 6.1 [0.4-18.0] | 6.07 [4.32-8.53]    | 97.3 [94.7-98.6] | <0.0001 |         | 0.108  |
|                  | IOTF        | 1  | 1775  | 14   | 0.8 [0.4-1.2]  | -                   | -                | -       |         | -      |
|                  | CDC         | 1  | 400   | 30   | 7.5 [5.1-10.3] | -                   | -                | -       |         | -      |
| Coverage         |             |    |       |      |                |                     |                  |         | <0.0001 |        |
| Overall          | WHO         | 18 | 34895 | 979  | 6.1 [3.4-9.7]  | 9.12 [8.32-9.99]    | 98.8 [98.6-99.0] | <0.0001 |         | 0.0019 |
|                  | IOTF        | 16 | 50779 | 1120 | 4.0 [2.5-5.9]  | 8.56 [7.74-9.47]    | 98.6 [98.3-98.9] | <0.0001 |         | 0.003  |
|                  | CDC         | 4  | 2433  | 158  | 6.9 [5.0-9.0]  | 1.82 [1.07-3.09]    | 69.8 [13.2-89.5] | 0.019   |         | 0.320  |
|                  | Unspecified | 2  | 1361  | 8    | 0.5 [0.01-1.7] | 2.34 [-]            | 81.8 [22.9-95.7] | 0.019   |         | -      |
| Publication year |             |    |       |      |                |                     |                  |         |         |        |
| <2013            |             |    |       |      |                |                     |                  |         | 0.154   |        |
|                  | WHO         | 8  | 28213 | 360  | 3.3 [1.4-6.1]  | 5.76 [4.76-6.97]    | 97.0 [95.6-97.9] | <0.0001 | 0.037   | 0.039  |
|                  | IOTF        | 6  | 40438 | 691  | 3.3 [1.2-6.3]  | 11.95 [10.39-13.74] | 99.3 [99.1-99.5] | <0.0001 | 0.488   | 0.201  |
|                  | CDC         | 2  | 1587  | 105  | 6.2 [4.1-8.7]  | 2.81 [-]            | 87.3 [50.5-96.8] | 0.005   | 0.560   | -      |
|                  | Unspecified | 0  | -     | -    | -              | -                   | -                | -       | -       | -      |
| >=2013           |             |    |       |      |                |                     |                  |         | <0.0001 |        |
|                  | WHO         | 10 | 6682  | 619  | 8.9 [4.4-14.8] | 7.34 [6.36-8.49]    | 98.1 [97.5-98.6] | <0.0001 |         | 0.572  |

|             |       |             |             |       |      |                |                     |                  |                  |         |       |       |
|-------------|-------|-------------|-------------|-------|------|----------------|---------------------|------------------|------------------|---------|-------|-------|
| Sample size | <638  | IOTF        | 10          | 10341 | 429  | 4.4 [2.9-6.3]  | 4.25 [3.46-5.21]    | 94.5 [91.7-96.3] | <0.0001          |         | 0.087 |       |
|             |       | CDC         | 2           | 846   | 53   | 7.7 [3.7-13.0] | 1.40 [ - ]          | 49.2 [ - ]       | 0.160            |         | -     |       |
|             |       | Unspecified | 2           | 1361  | 8    | 0.5 [0.0-1.7]  | 2.34 [ - ]          | 81.8 [22.9-95.7] | <0.0001          |         | -     |       |
|             |       |             |             |       |      |                |                     |                  | <0.0001          |         |       |       |
|             |       |             |             |       |      |                |                     |                  | 0.532            |         |       |       |
|             |       |             | WHO         | 11    | 3485 | 310            | 7.1 [3.2-12.4]      | 5.37 [4.54-6.34] | 96.5 [95.1-97.5] | <0.0001 | 0.461 | 0.952 |
|             |       |             | IOTF        | 12    | 1874 | 110            | 3.5 [1.9-5.6]       | 1.21 [1.00-2.02] | 31.8 [0.0-75.6]  | 0.221   | 0.050 | 0.859 |
|             |       |             | CDC         | 3     | 1150 | 85             | 7.5 [4.8-10.7]      | 1.93 [1.06-3.54] | 73.3 [10.3-92.0] | 0.074   | 0.255 | 0.161 |
|             |       |             | Unspecified | 0     | -    | -              | -                   | -                | -                | -       | -     |       |
|             |       |             |             |       |      |                |                     |                  |                  | <0.0001 |       |       |
|             | >=638 | WHO         | 7           | 31410 | 669  | 4.8 [1.5-9.8]  | 11.88 [10.45-13.50] | 99.3 [99.1-99.5] | <0.0001          |         | 0.053 |       |
|             |       | IOTF        | 4           | 48905 | 1010 | 5.8 [4.6-7.2]  | 9.51 [8.52-10.62]   | 98.9 [98.6-99.1] | <0.0001          |         | 0.017 |       |
|             |       | CDC         | 1           | 1283  | 73   | 5.7 [4.5-7.0]  | -                   | -                | -                |         | -     |       |
|             |       | Unspecified | 2           | 1361  | 8    | 0.5 [0.0-4.5]  | 2.34 [ - ]          | 81.8 [22.9-95.7] | 0.019            |         | -     |       |

Note: - not computable

**Fig S1: Forest plot showing the effect of omitting one study at a time on pooled prevalence and heterogeneity statistics from studies that used World Health Organisation (WHO) criteria to diagnose prevalent obesity (first panel) and overweight (second panel) in African school learners**

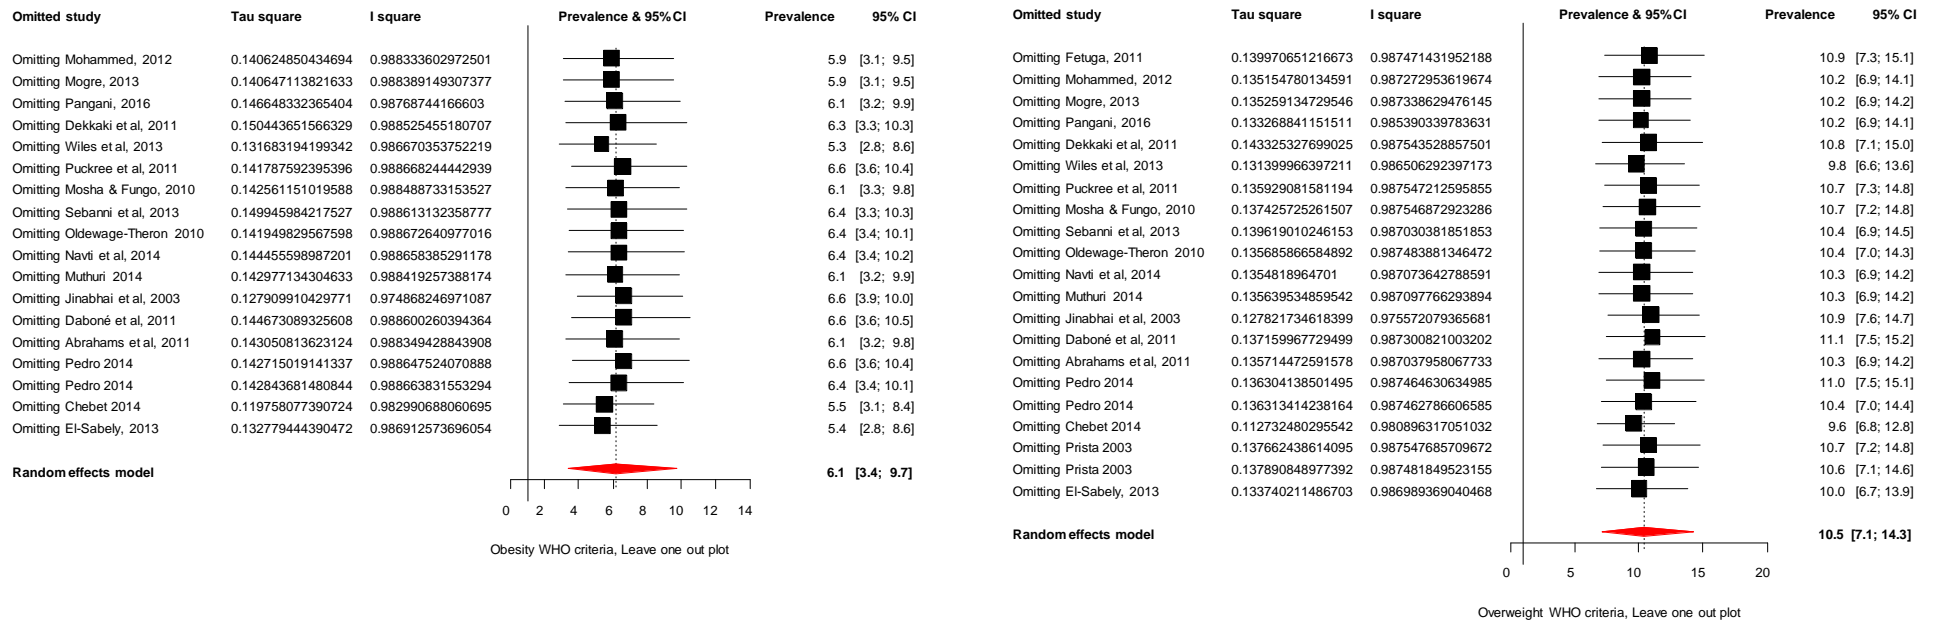

**Fig S2: Forest plot showing the effect of omitting one study at a time on pooled prevalence and heterogeneity statistics from studies that used International Obesity Task Force (IOTF, upper panels) and Centre for Diseases Control (CDC, lower panels) criteria to diagnose prevalent obesity (left panels) and overweight (right panels) in African school learners**

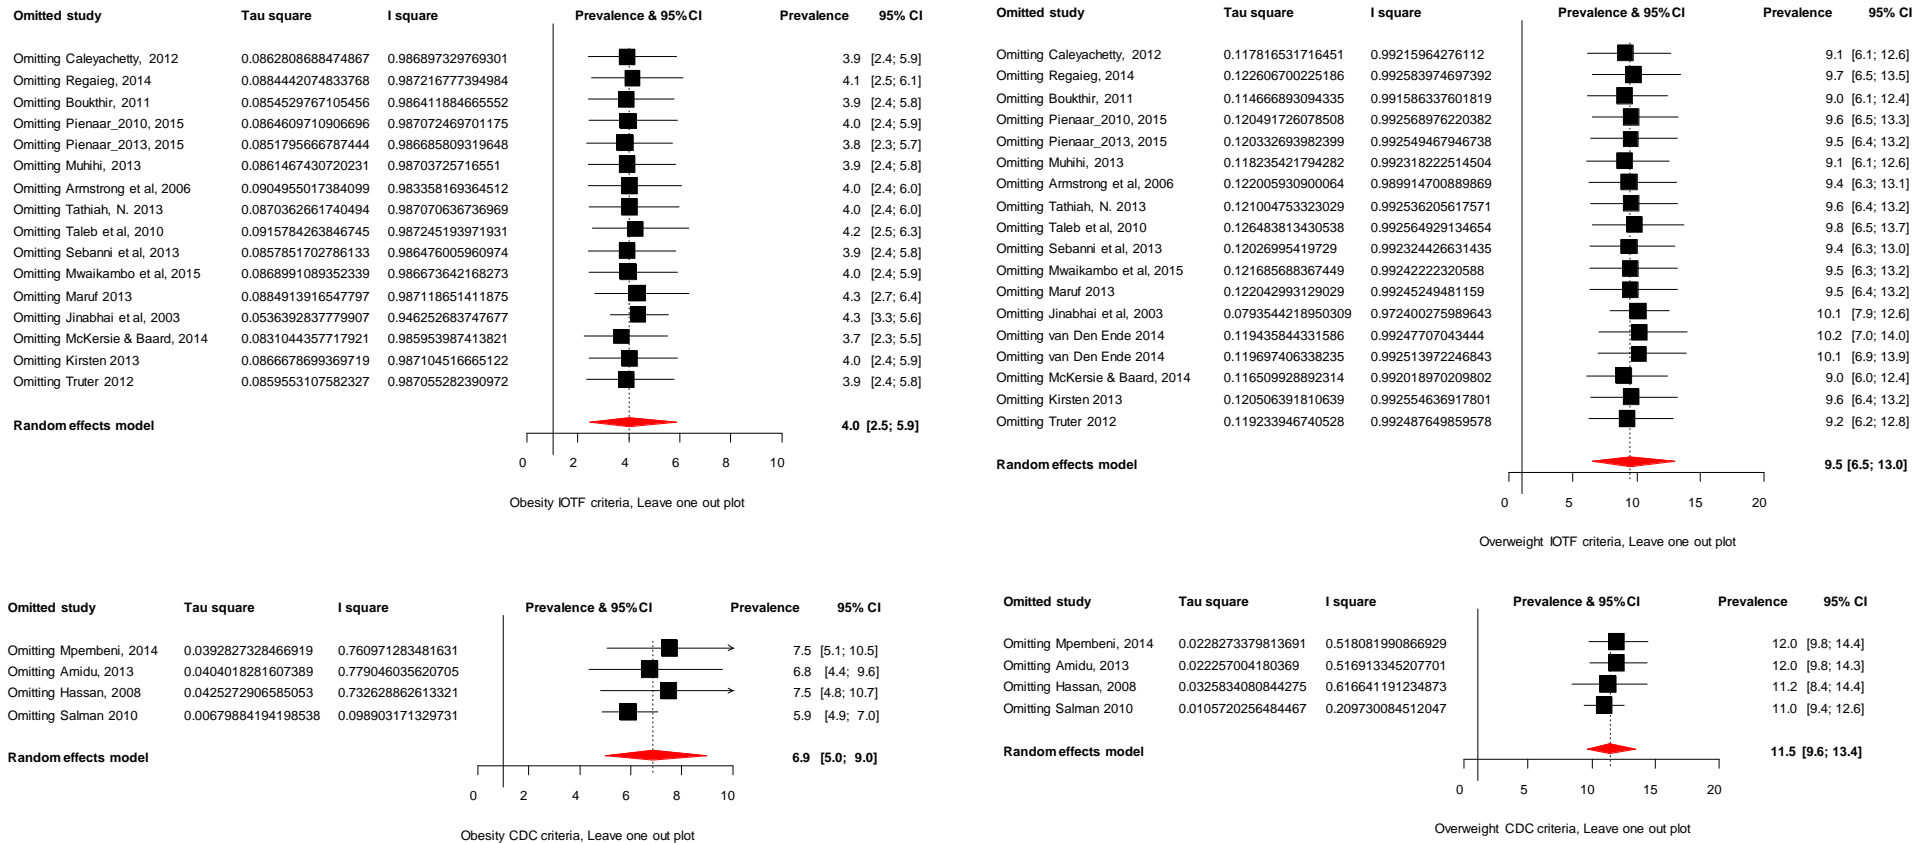



**Fig S3: Funnel plots for the assessment of publication bias in studies of prevalent overweight (upper panels) and obesity (lower panels) by the World Health organisation (left column), International Obesity Task Force (middle column) and Centre for Diseases Control (right column) criteria, in African school going children, after implementation of the trim & fill methods to correct for publication bias.**

For each figure panel, the dots are the arcsine transformed prevalence estimates of individual studies (horizontal axis) plotted against their standard error (vertical axis). The dotted vertical blue line is for the observed pooled prevalence estimates after imputation of missing studies. The p-value from the egger test of bias is also shown.

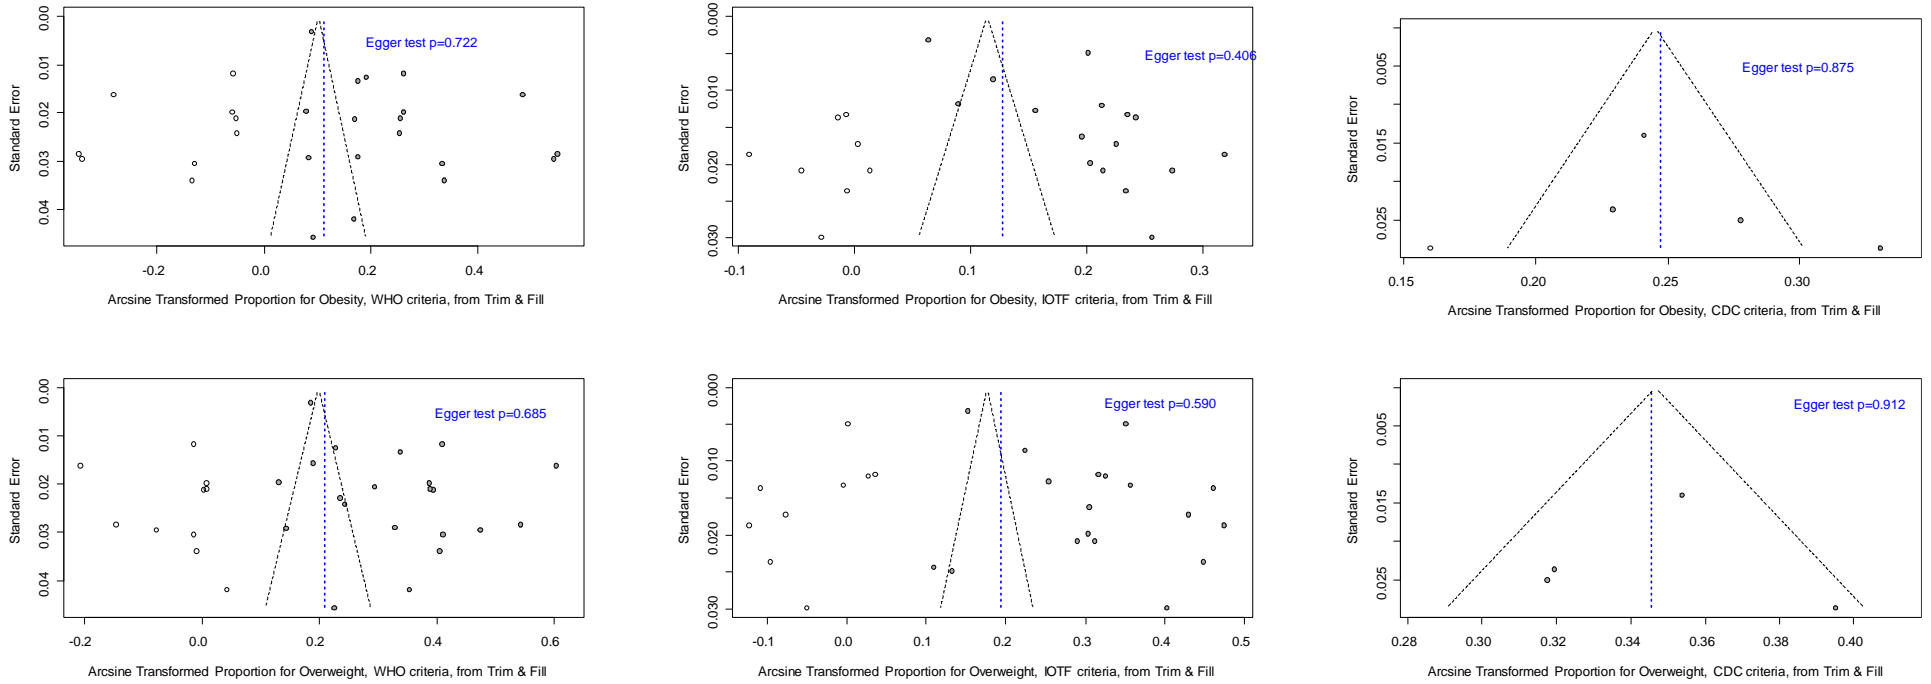

**Fig. S4: Forest plots showing the effect of studies imputations on pooled prevalence estimates from trim and fill methods, for studies that used the World Health Organisation (WHO) criteria to diagnose obesity (first panel) or overweight (second panel) in African school going children**

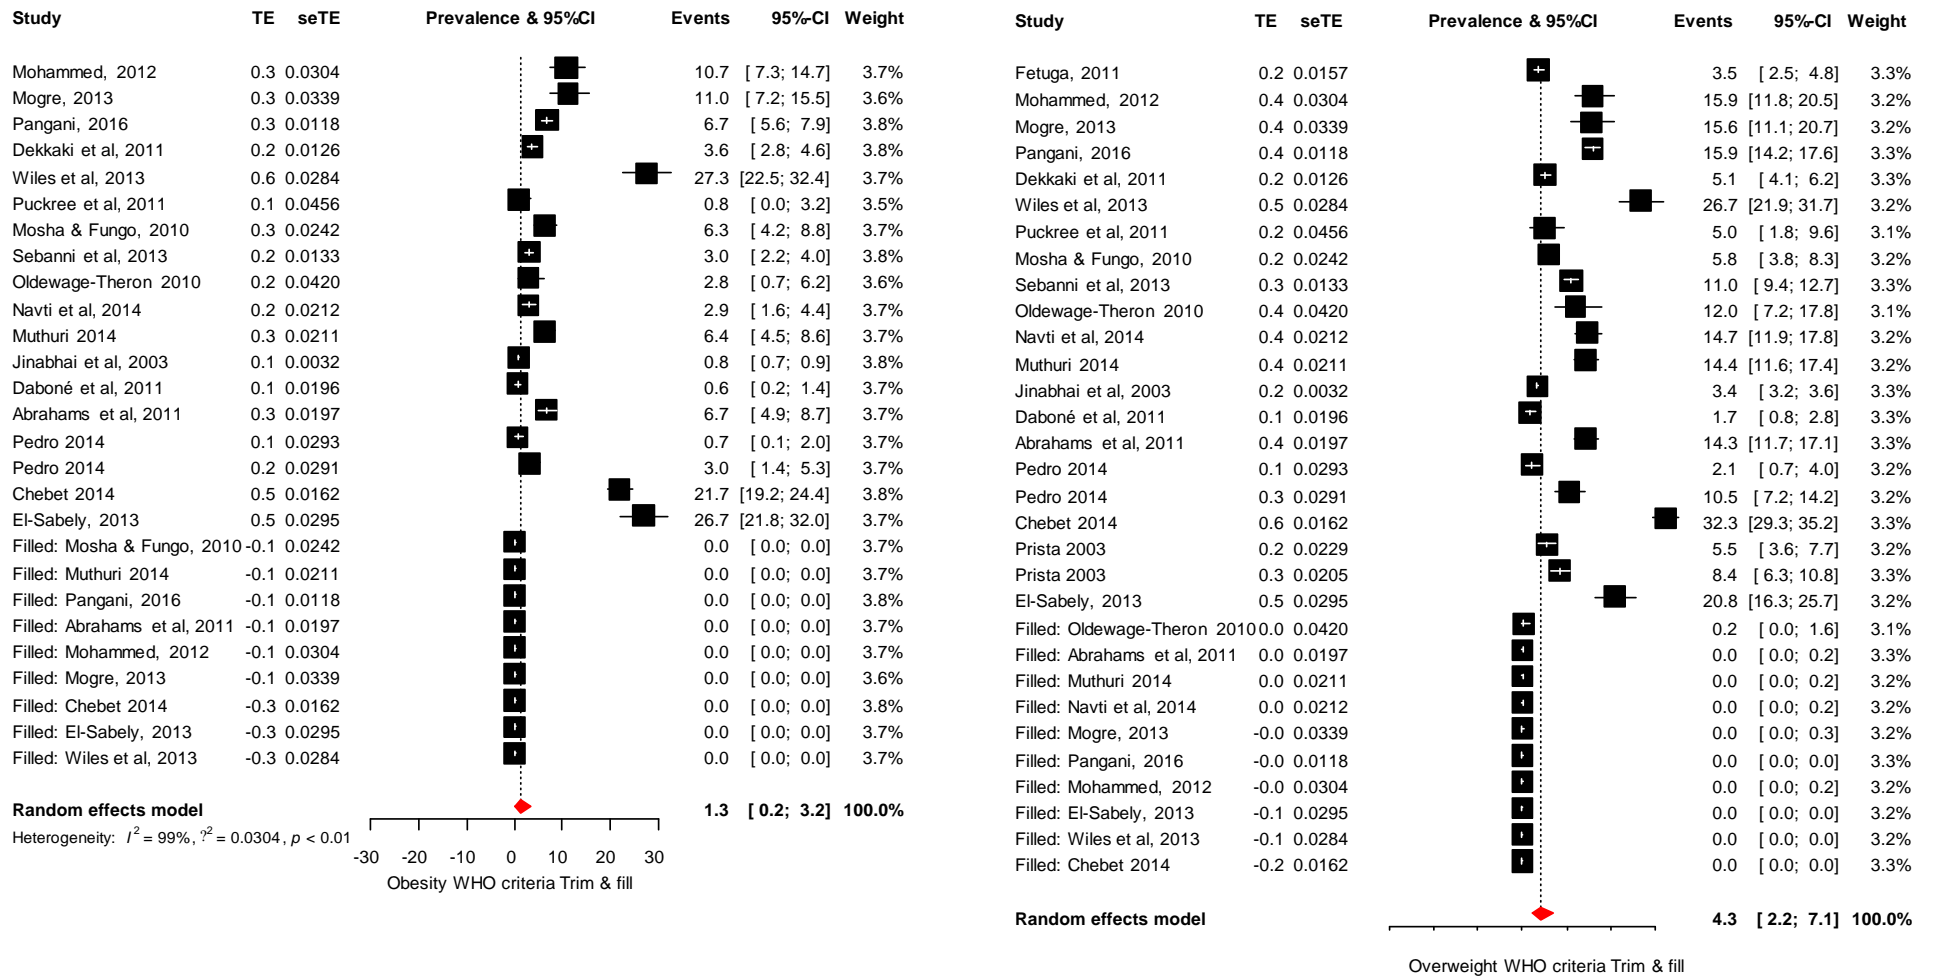

**Fig. S5: Forest plots showing the effect of studies imputations on pooled prevalence estimates from trim and fill methods, for studies that used the International Obesity Task Force (IOTF, upper panels) or Centre for Diseases Control (CDC, lower panels) criteria to diagnose obesity (left panels) or overweight (right panels) in African school going children**

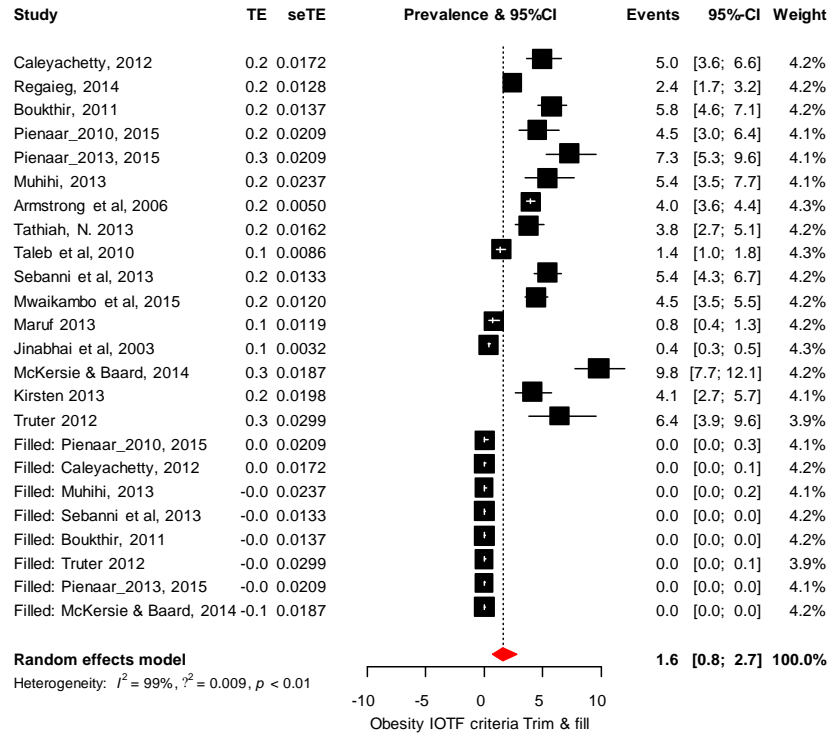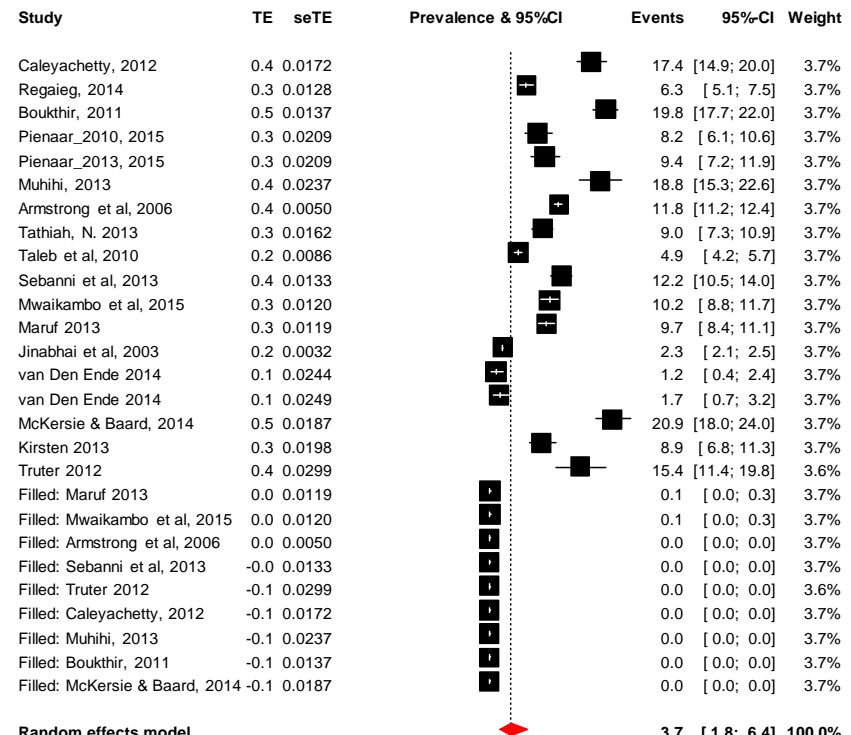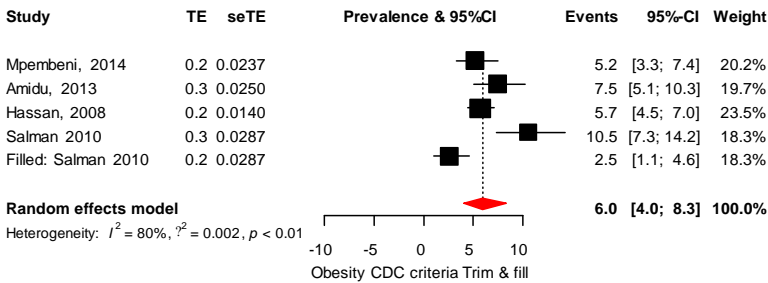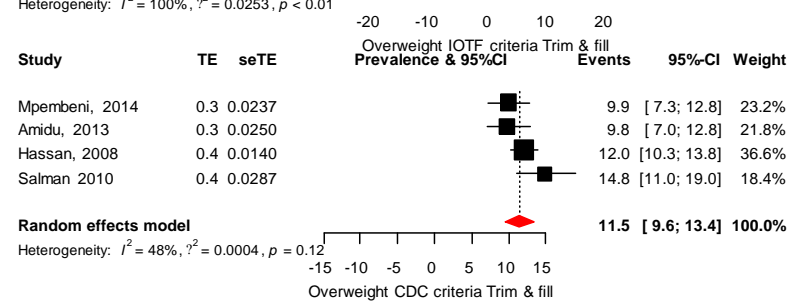

Fig. S6: Prevalence of overweight by major diagnostic criteria in boys. Black boxes represent the effect estimates (prevalence) and the horizontal bars about are for the 95% confidence intervals (CIs). The diamond is for the pooled effect estimate and 95% CI.

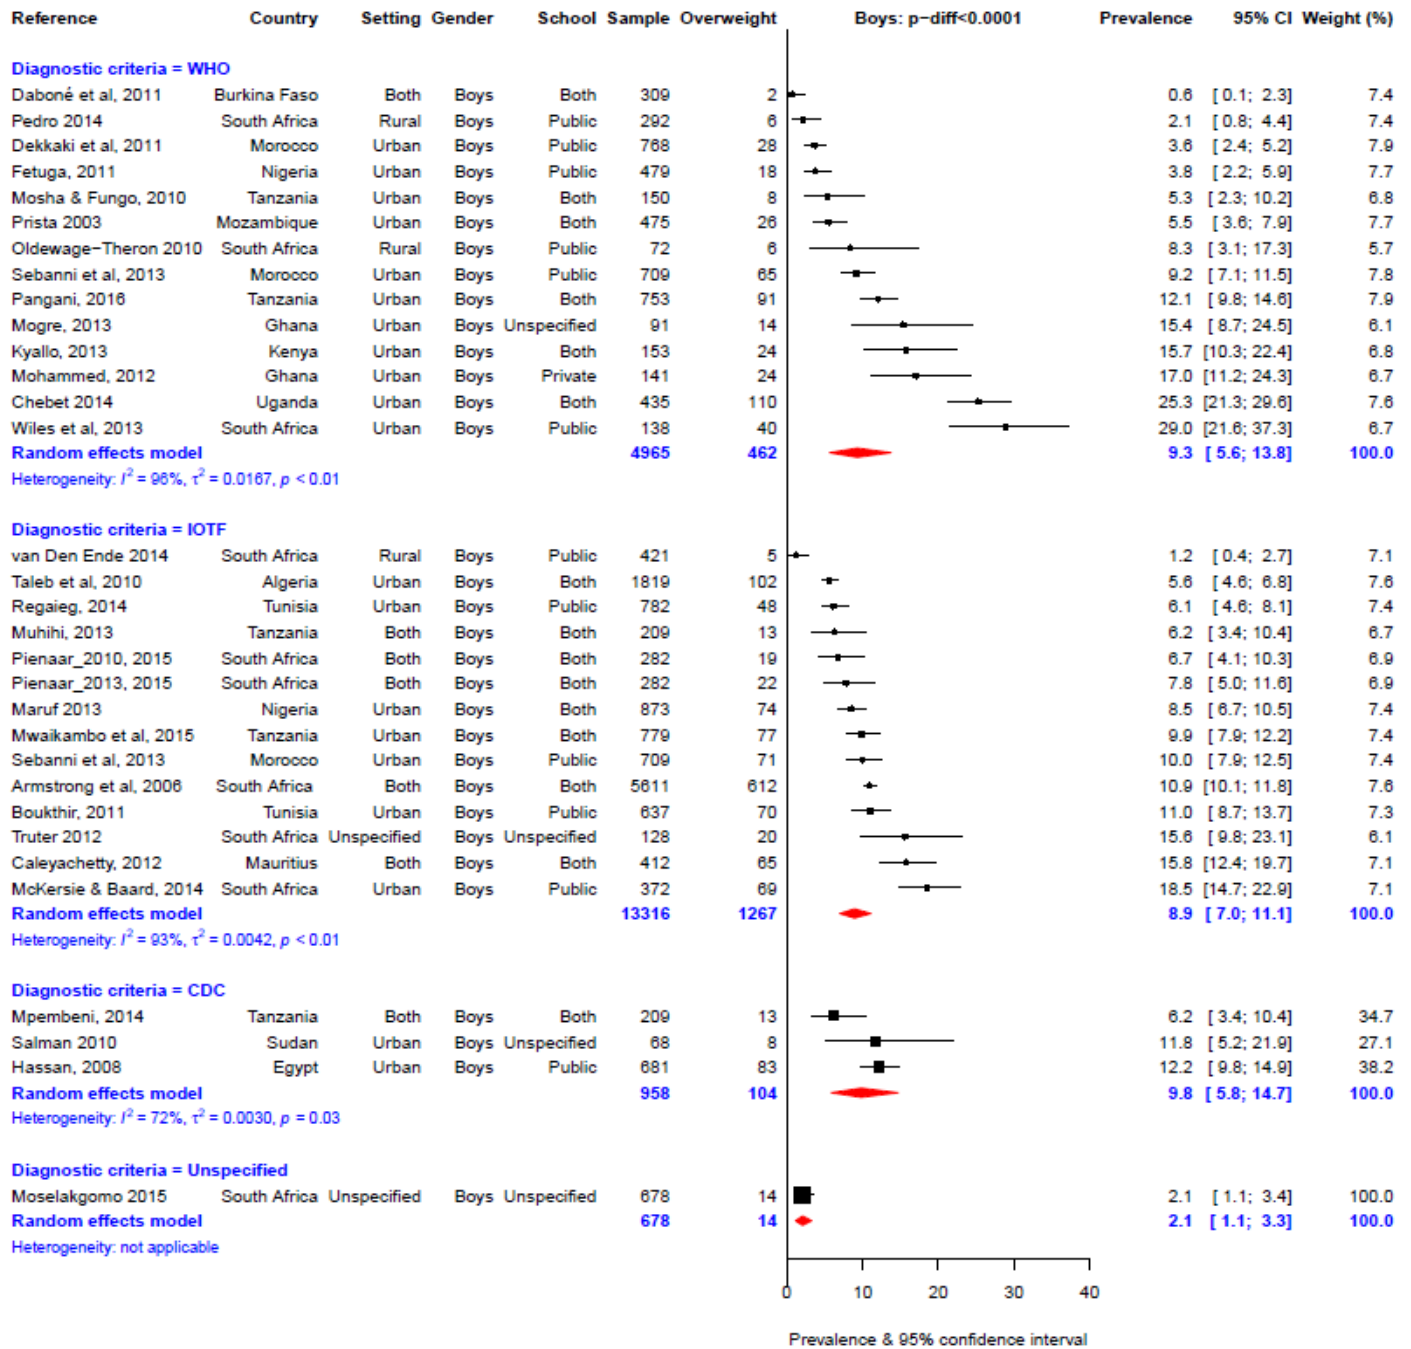

Fig.S7: Prevalence of overweight by major diagnostic criteria in girls. Black boxes represent the effect estimates (prevalence) and the horizontal bars about are for the 95% confidence intervals (CIs). The diamond is for the pooled effect estimate and 95% CI.

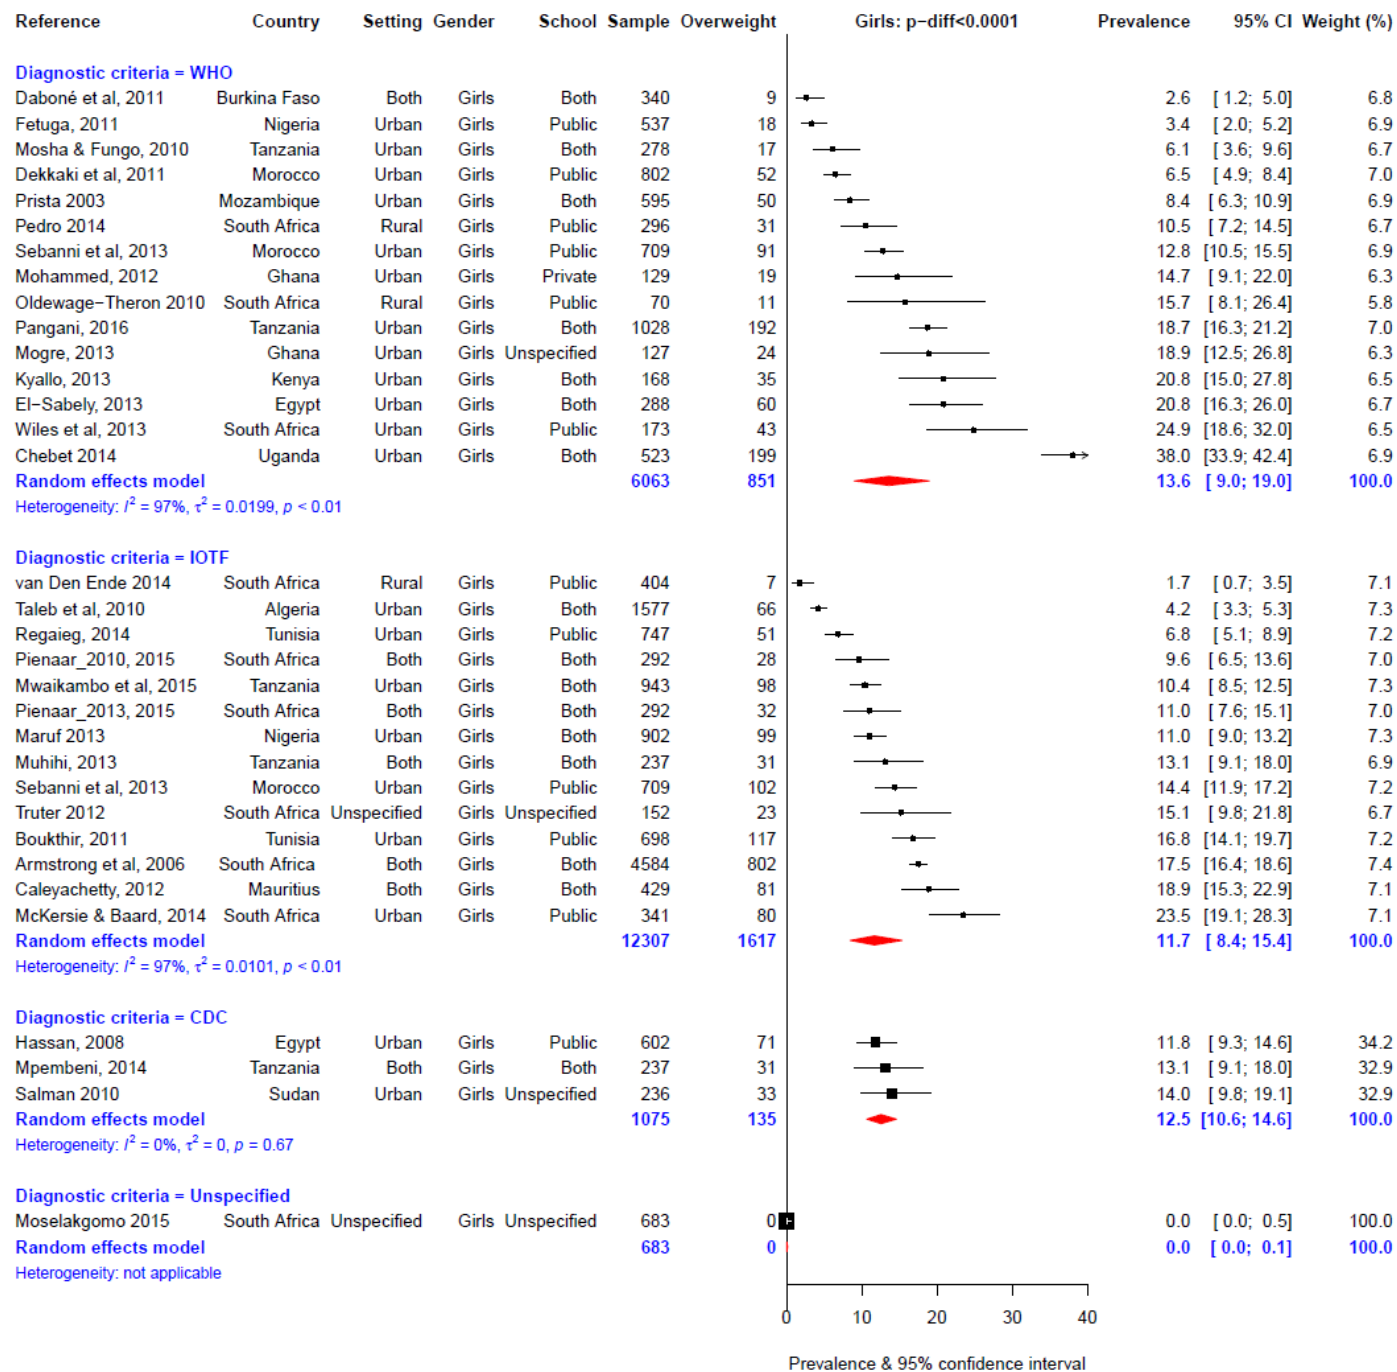

**Fig S8: Prevalence of obesity by major diagnostic criteria in boys. Black boxes represent the effect estimates (prevalence) and the horizontal bars about are for the 95% confidence intervals (CIs). The diamond is for the pooled effect estimate and 95% CI.**

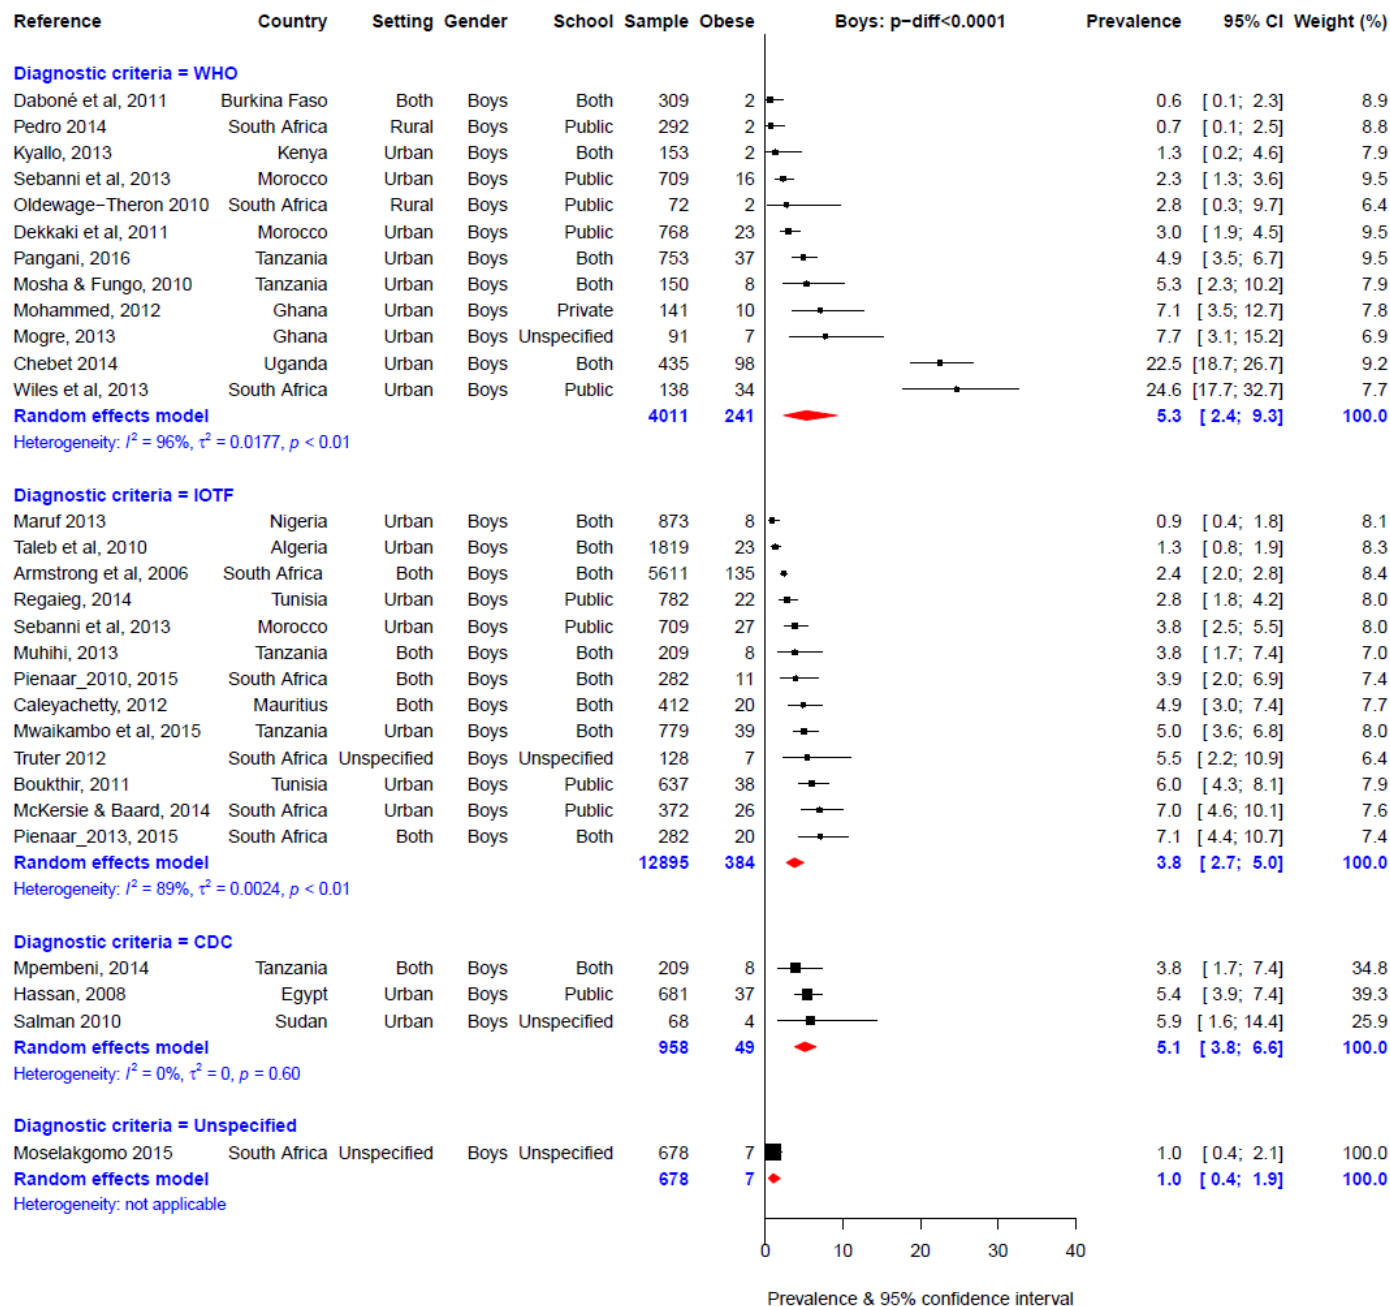

Fig. S9: Prevalence of obesity by major diagnostic criteria in girls. Black boxes represent the effect estimates (prevalence) and the horizontal bars about are for the 95% confidence intervals (CIs). The diamond is for the pooled effect estimate and 95% CI.

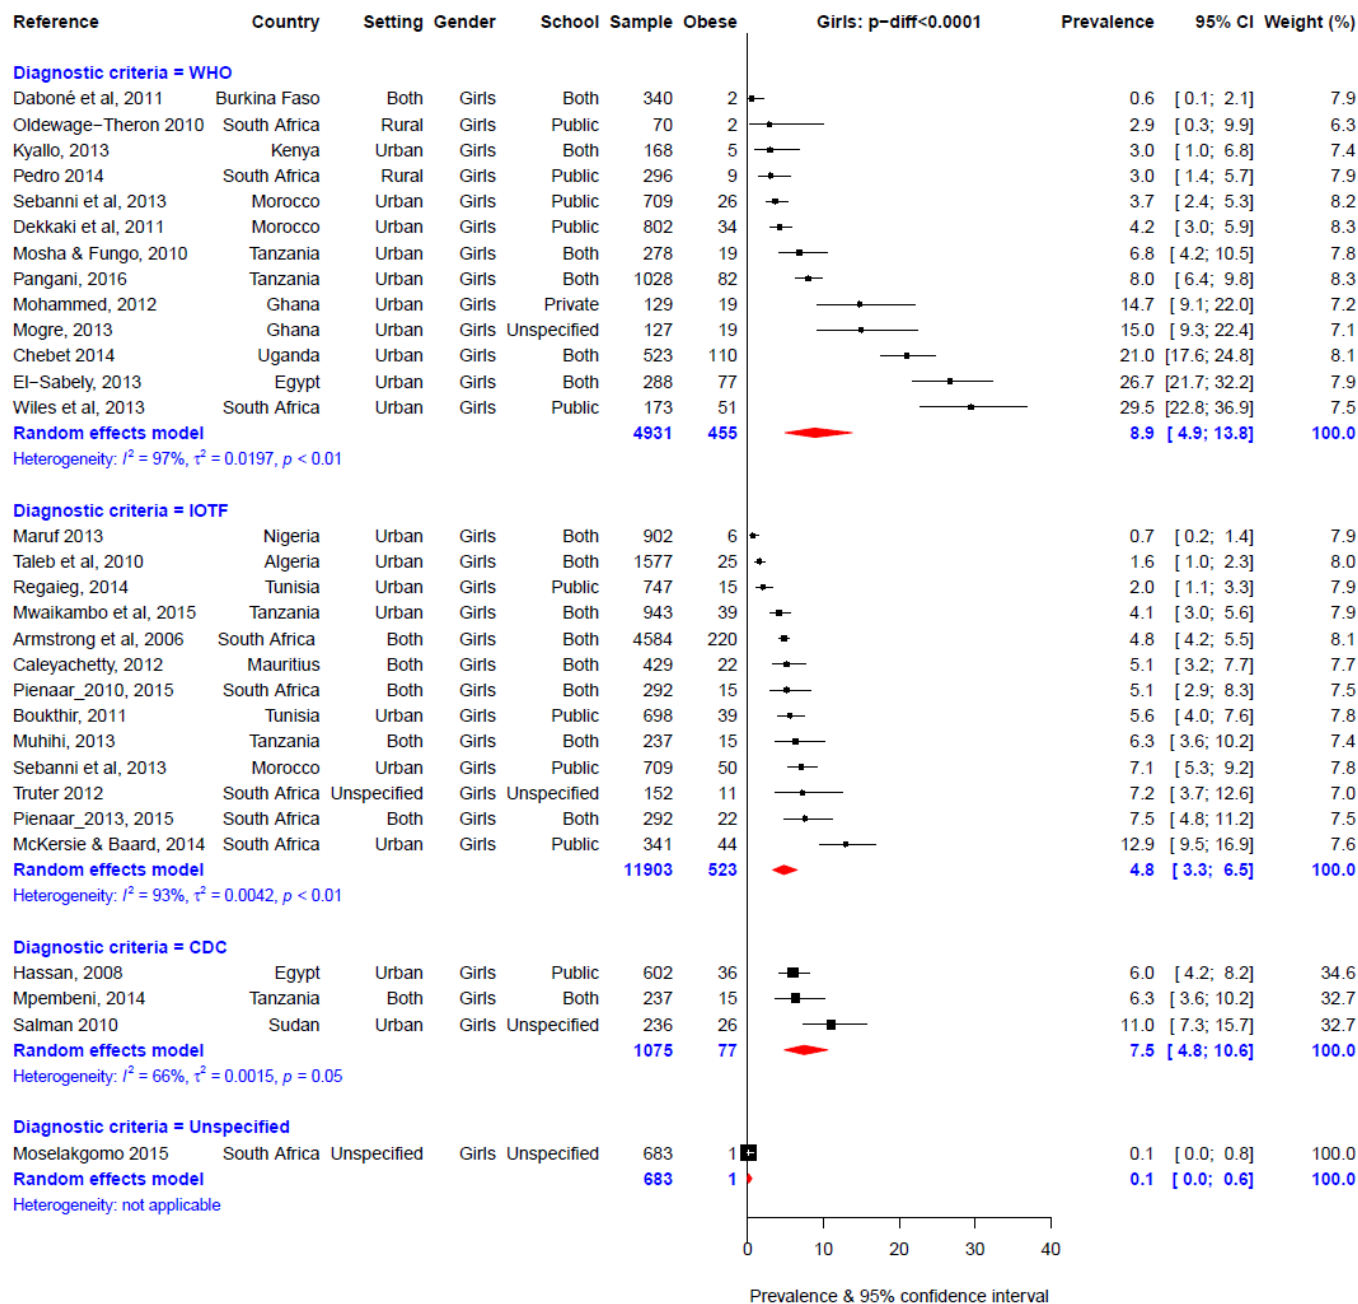

Fig. S10: Prevalence of overweight by major diagnostic criteria in urban studies. Black boxes represent the effect estimates (prevalence) and the horizontal bars about are for the 95% confidence intervals (CIs). The diamond is for the pooled effect estimate and 95% CI.

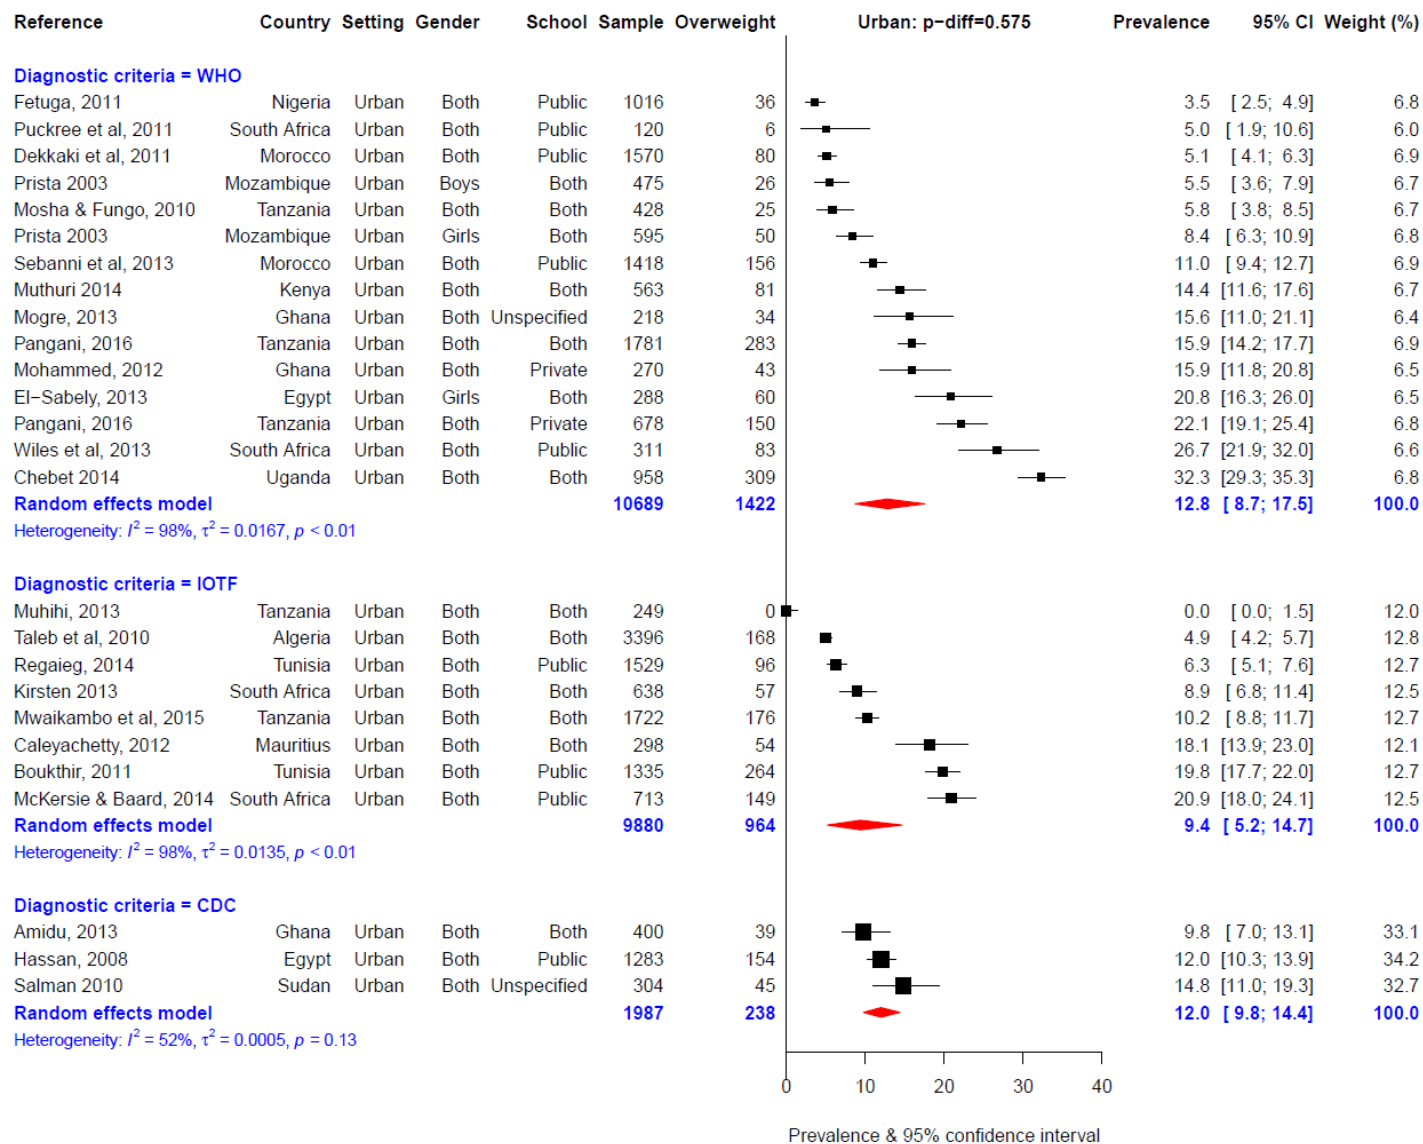



Fig. S11: Prevalence of overweight by major diagnostic criteria in rural studies. Black boxes represent the effect estimates (prevalence) and the horizontal bars about are for the 95% confidence intervals (CIs). The diamond is for the pooled effect estimate and 95% CI.

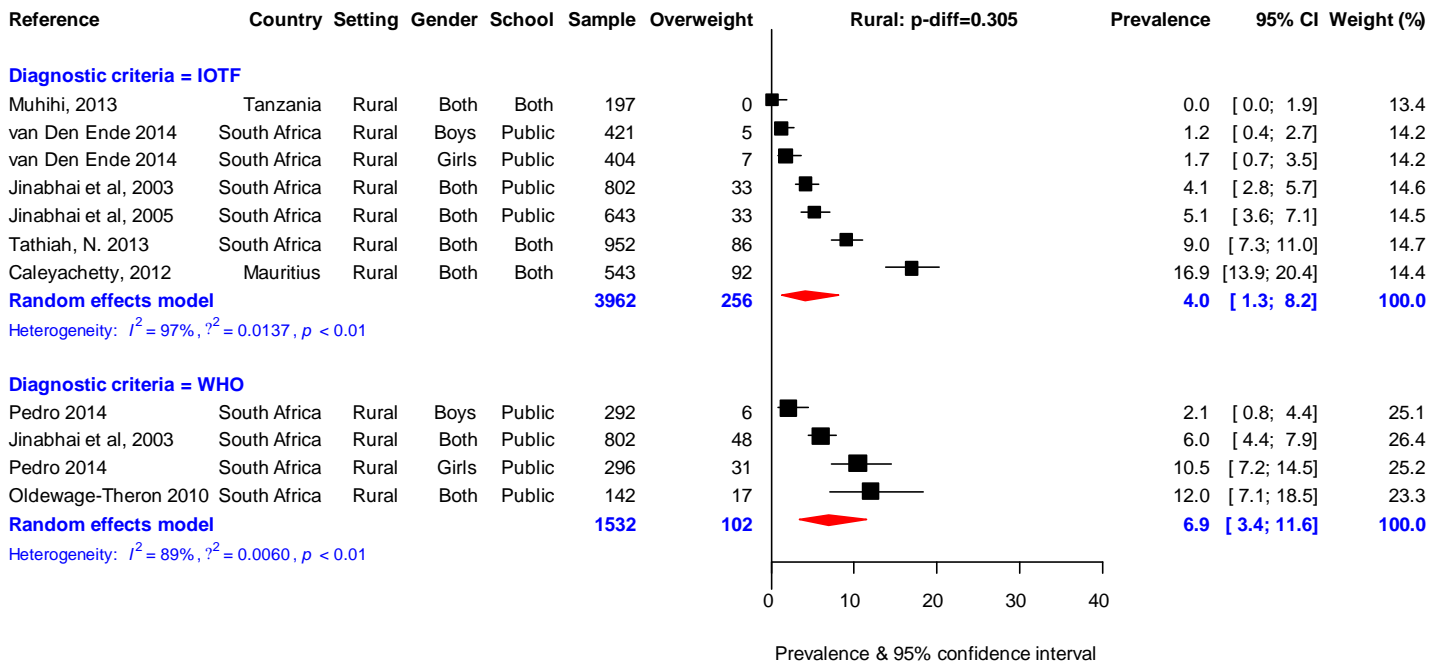

Fig. S12: Prevalence of overweight by major diagnostic criteria in urban and rural studies. Black boxes represent the effect estimates (prevalence) and the horizontal bars about are for the 95% confidence intervals (CIs). The diamond is for the pooled effect estimate and 95% CI.

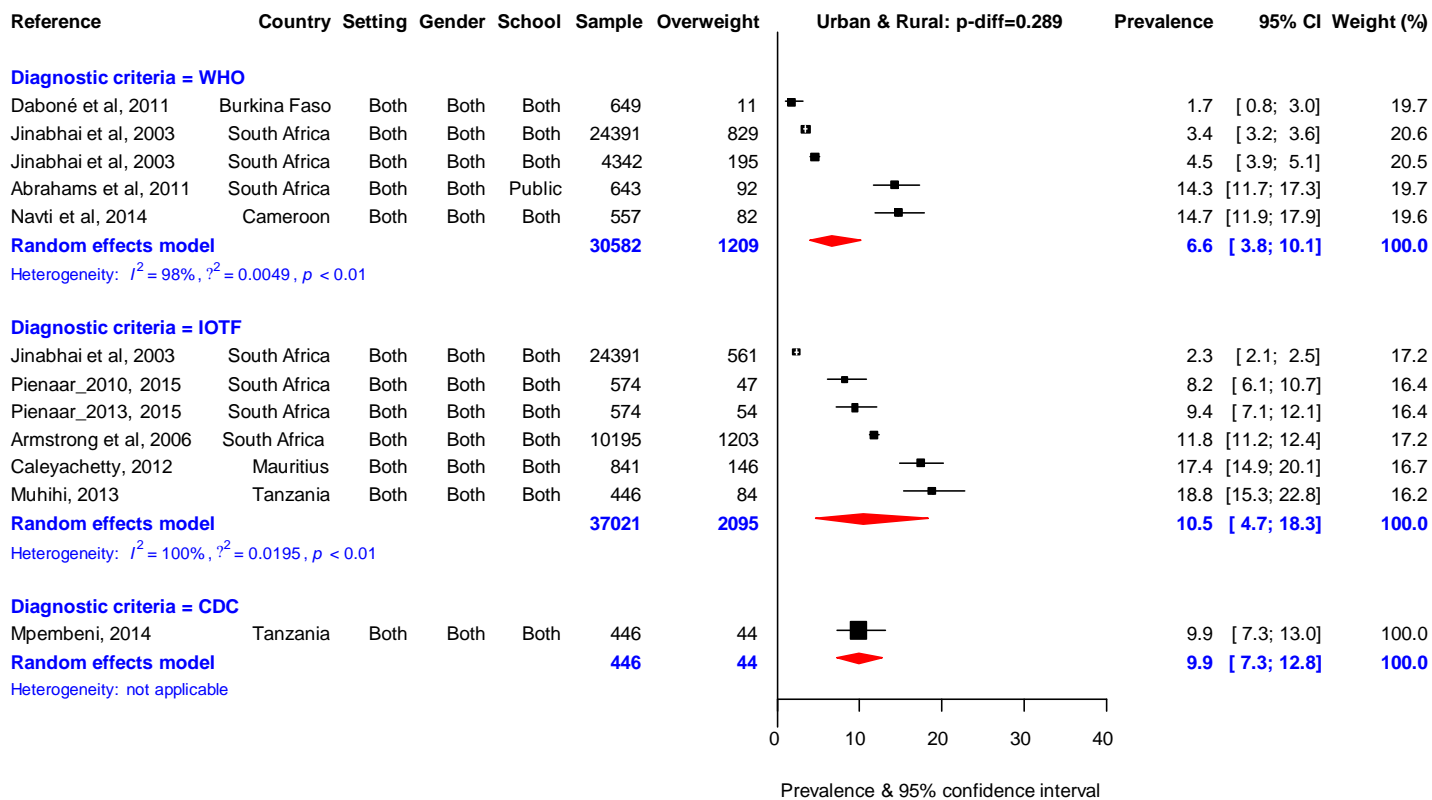

Fig. S13: Prevalence of obesity by major diagnostic criteria in urban studies. Black boxes represent the effect estimates (prevalence) and the horizontal bars about are for the 95% confidence intervals (CIs). The diamond is for the pooled effect estimate and 95% CI.

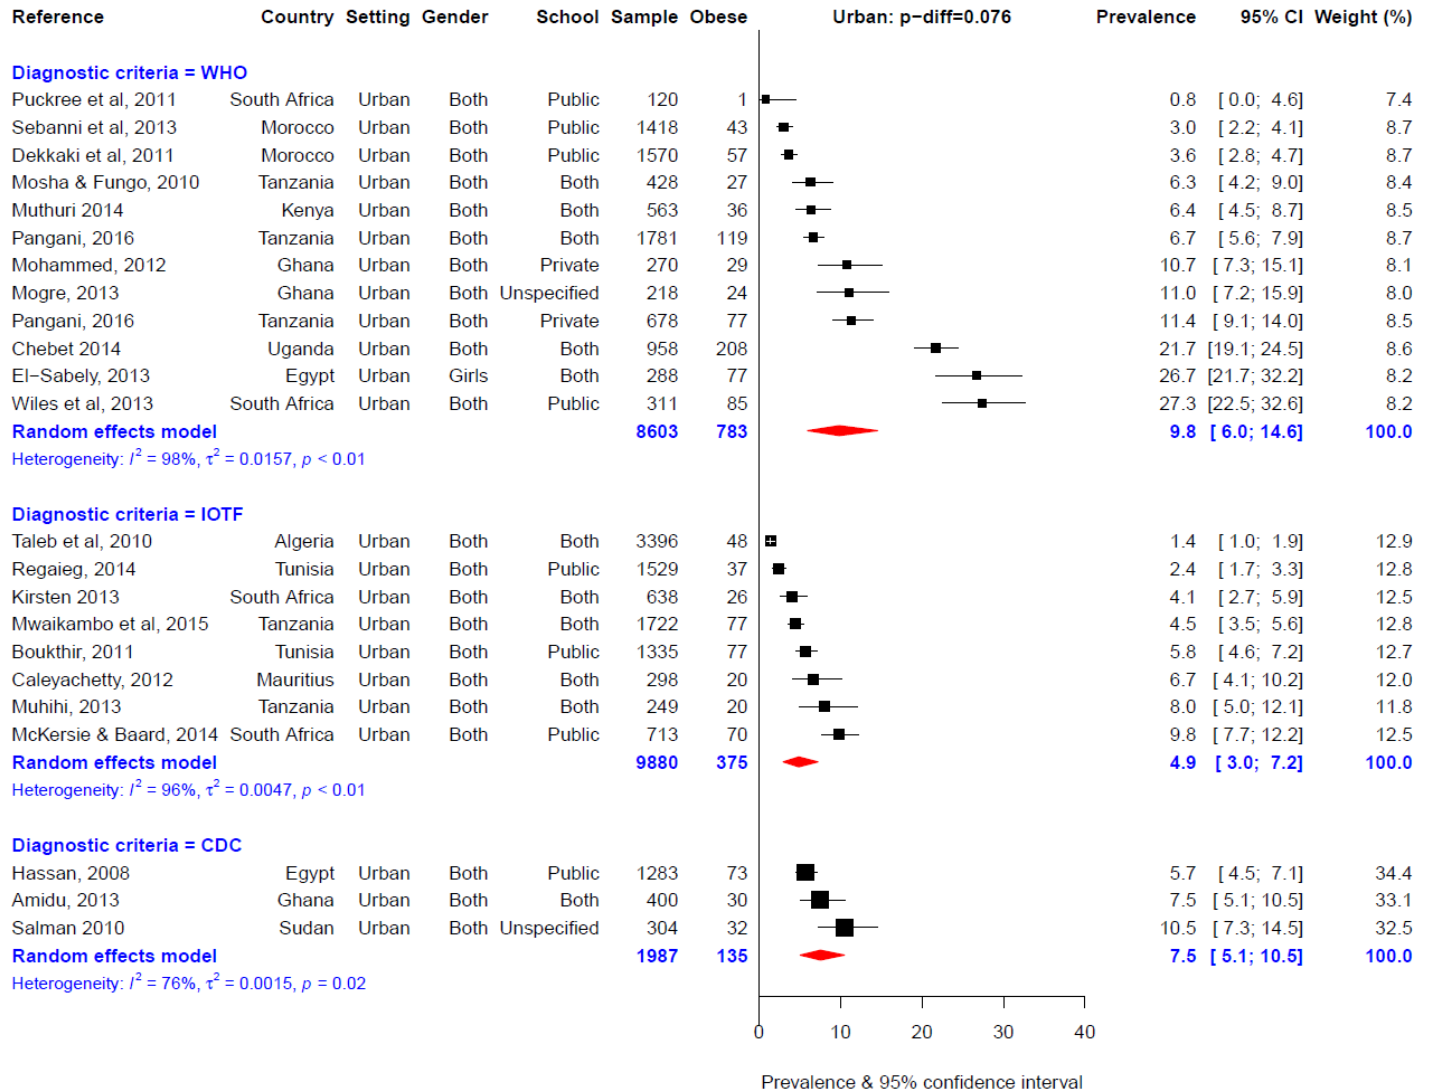

Fig. S14: Prevalence of obesity by major diagnostic criteria in rural studies. Black boxes represent the effect estimates (prevalence) and the horizontal bars about are for the 95% confidence intervals (CIs). The diamond is for the pooled effect estimate and 95% CI.

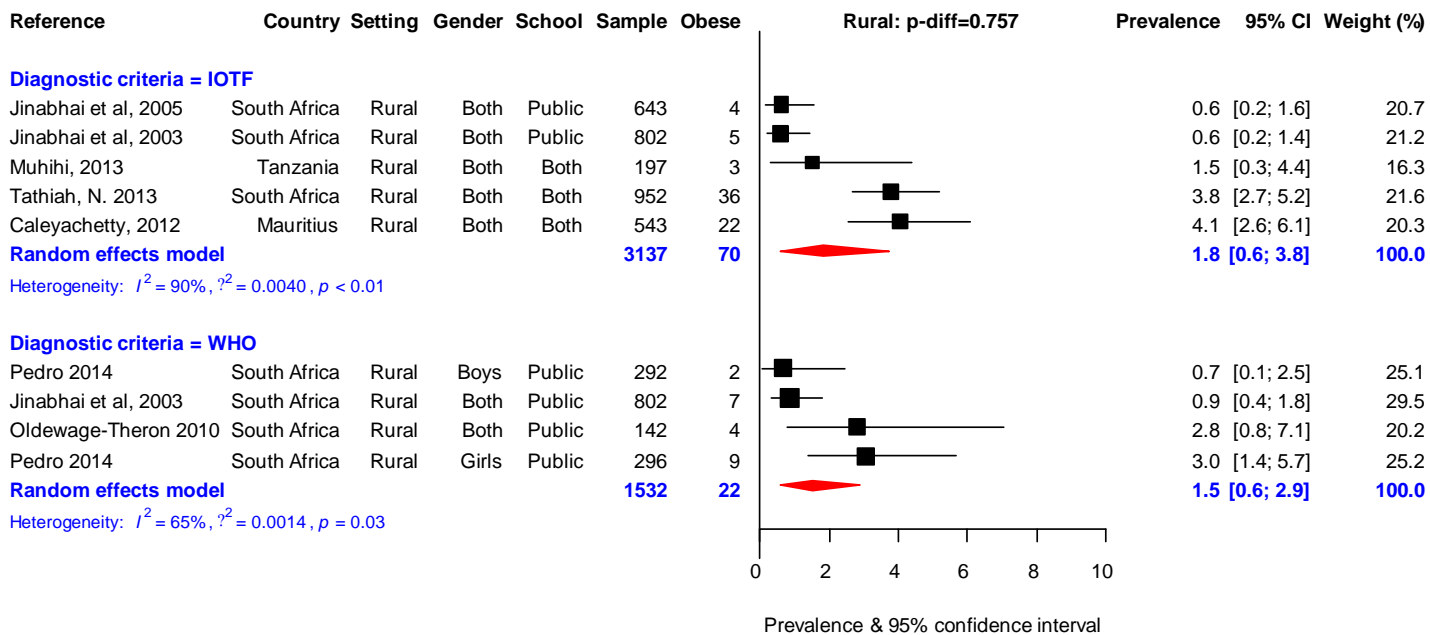

Fig. S15: Prevalence of overweight by major diagnostic criteria in public schools studies. Black boxes represent the effect estimates (prevalence) and the horizontal bars about are for the 95% confidence intervals (CIs). The diamond is for the pooled effect estimate and 95% CI.

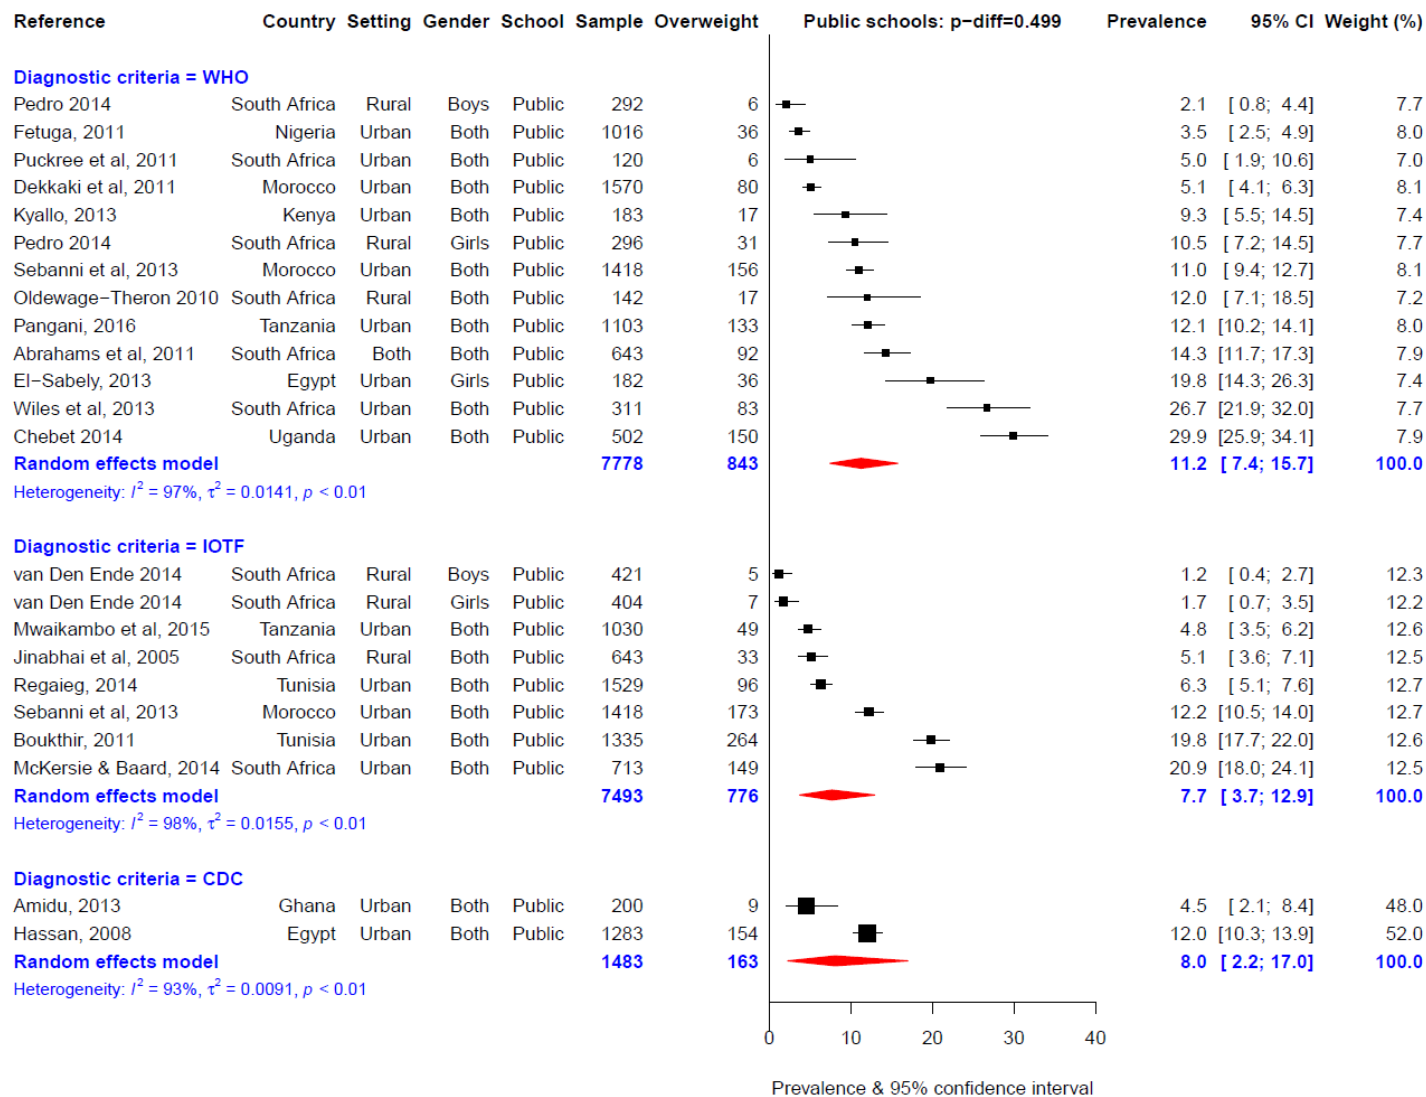

Fig. S16: Prevalence of overweight by major diagnostic criteria in private schools studies. Black boxes represent the effect estimates (prevalence) and the horizontal bars about are for the 95% confidence intervals (CIs). The diamond is for the pooled effect estimate and 95% CI.

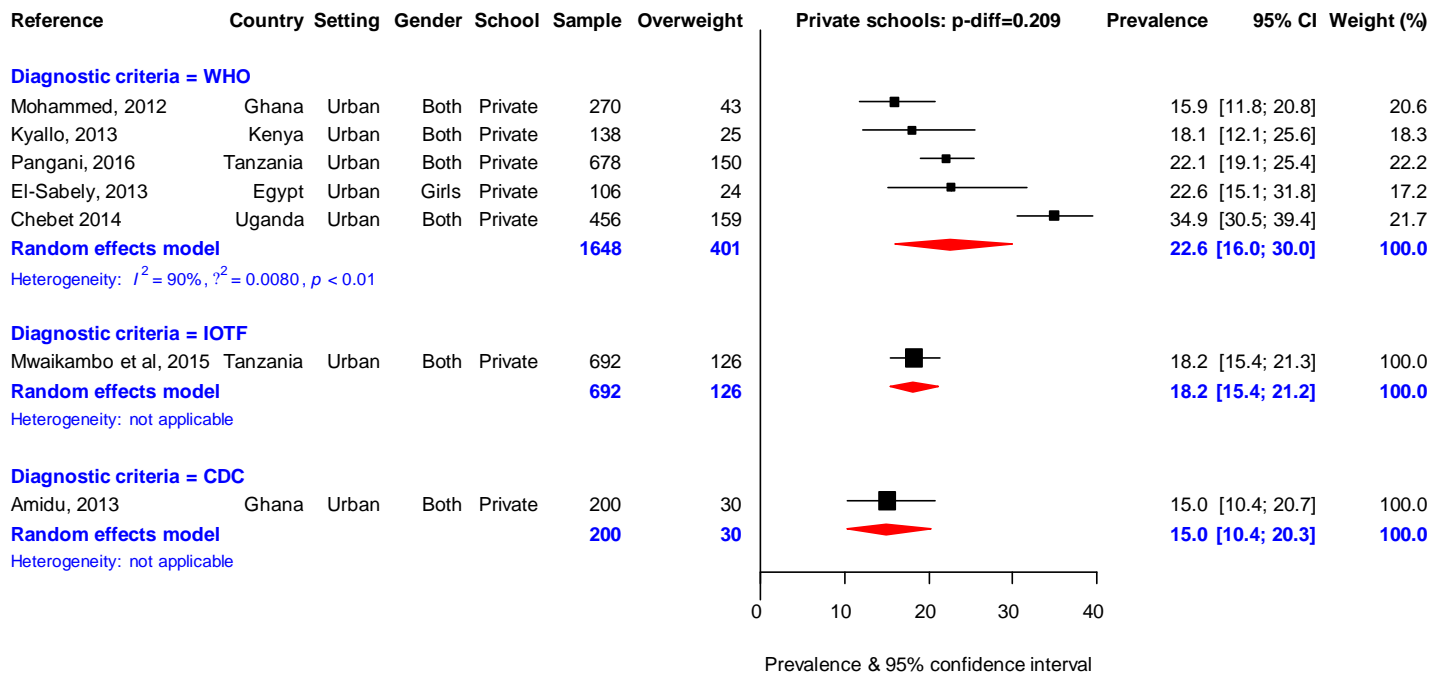

Fig. S17: Prevalence of obesity by major diagnostic criteria in public schools studies. Black boxes represent the effect estimates (prevalence) and the horizontal bars about are for the 95% confidence intervals (CIs). The diamond is for the pooled effect estimate and 95% CI.

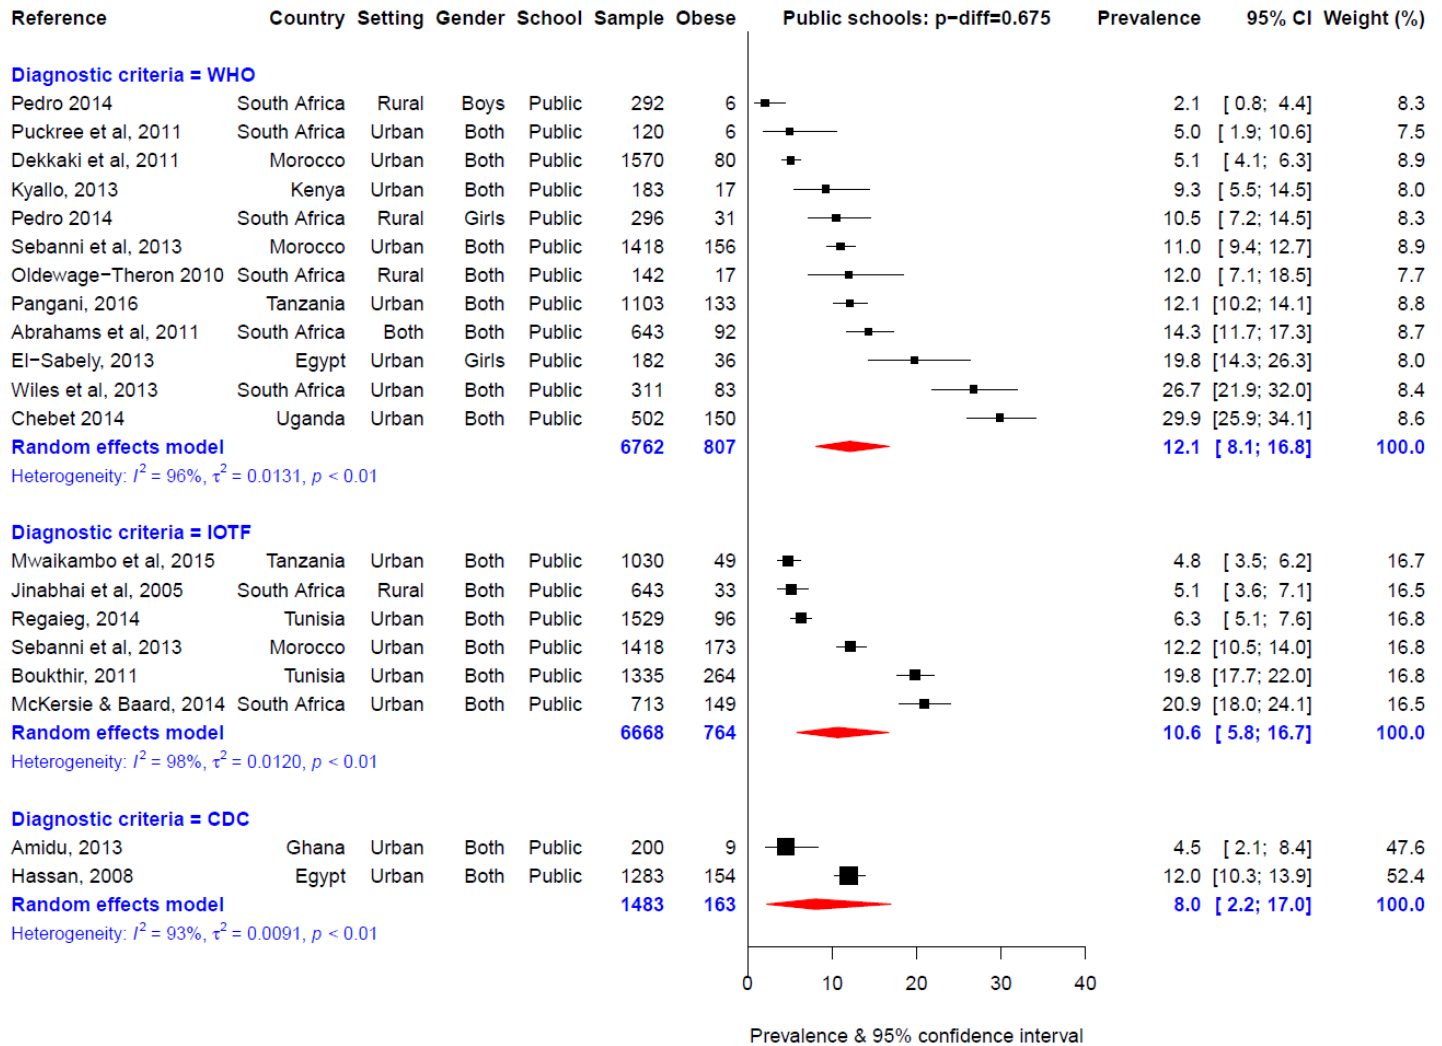

Fig. S18: Prevalence of obesity by major diagnostic criteria in private schools studies. Black boxes represent the effect estimates (prevalence) and the horizontal bars about are for the 95% confidence intervals (CIs). The diamond is for the pooled effect estimate and 95% CI.

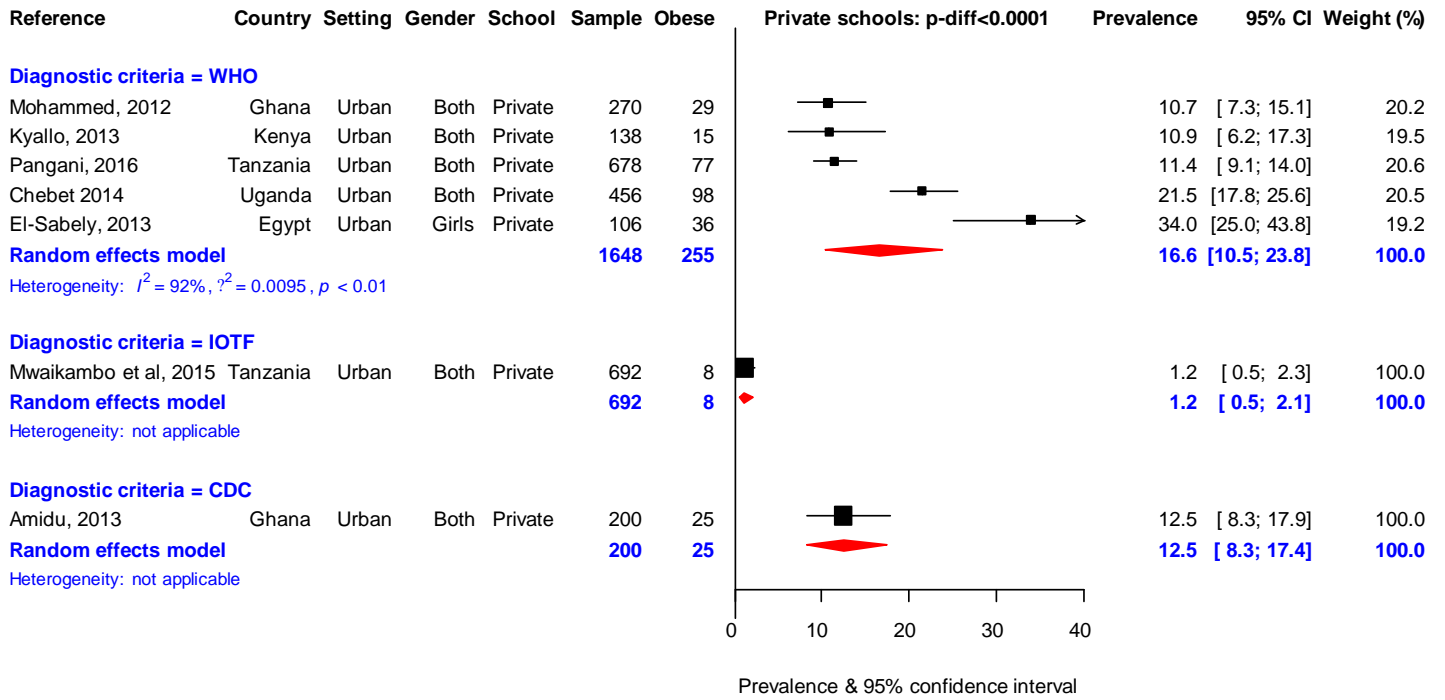

Supplement: OSP4-5-487-s001.pdf [file OSP4-5-487-s001.pdf]
